# Supplementary material for: Comprehensive Meta-Analysis of Excess Mortality in Depression in the General Community Versus Patients With Specific Illnesses
Source: Atypon-hosted journal article supplement (doi:10.1176/appi.ajp.2013.13030325), 2014-01-17
Supplement: 453_ds001.pdf [file 453_ds001.pdf]

## **Appendix A. Detailed search string in PubMed**

((("depressive disorder"[mesh terms]) or ("depressive"[all fields] and "disorder"[all fields]) or "depressive disorder"[all fields] or "depression"[all fields] or "depression"[mesh terms]) and (("mortality"[subheading] or "mortality"[all fields] or "mortality"[mesh terms]) or ("death"[mesh terms] or "death"[all fields]) or ("survival"[all fields] or "survival"[mesh terms]))) AND ("Longitudinal Studies"[Mesh] OR "Prospective Studies"[Mesh] OR "follow-up" OR prospective OR survive OR prognostic)

## **Appendix B. References to earlier meta-analyses and systematic reviews examining the association between excess mortality and depression**

- Barth J, Schumacher M, Herrman-Lingen C. Depression as a risk factor for mortality in patients with coronary heart disease: A meta-analysis. *Psychosom Med* 2004; 66: 802–13.
- Chida Y, Hamer M, Wardle J, Steptoe A. Do stress-related psychosocial factors contribute to cancer incidence and survival? *Nat Clin Pract* 2008; 5: 466-75.
- Cuijpers P, Smit F (2002). Excess mortality in depression: a meta-analysis of community studies. *J Affect Dis* 2002; 72: 227-36.
- Nicholson A, Kuper H, Hemingway H. Depression as an aetiologic and prognostic factor in coronary heart disease: a meta-analysis of 6362 events among 146 538 participants in 54 observational studies. *Eur Heart J* 2006; 27: 2763–74.
- Pan A, Sun Q, Okereke OI, Rexrode KM, Hu FB. Depression and risk of stroke morbidity and mortality: a meta-analysis and systematic review. *JAMA* 2011; 306: 1241-9.
- Pinquart M, Duberstein PR. Depression and cancer mortality: a meta-analysis. *Psychol Med* 2010; 40: 1797-810.
- Saz P, Dewey ME. Depression, depressive symptoms and mortality in persons aged 65 and over living in the community: A systematic review of the literature. *Int J Geriatr Psychiatry* 2001; 16: 622-30.
- Sørensen C, Friis-Hasché E, Haghfelt T, Bech P. Postmyocardial Infarction Mortality in Relation to Depression: A Systematic Critical Review. *Psychother Psychosom* 2005; 74: 69–80.
- Van Melle JP, de Jonge P, Spijkerman TA, Tijssen JGP, Ormel J, van Veldhuisen DJ, van den Brink RH, van den Berg MP. Prognostic association of depression following myocardial infarction with mortality and cardiovascular events: A meta-analysis. *Psychosom Med* 2004; 66: 814–22.
- Wulsin LR, Vaillant GE, Wells VE. A systematic review of the mortality of depression. *Psychosom Med* 1999; 61: 6–17.

## Appendix C. Risk of bias assessment

Each study was rated (by two independent raters) on the following 13 items.

1. The source population is adequately described for key characteristics. Choose on of the following possibilities:

1. A selected sample from the general population
  2. Patients with a heart disease
  3. Patients with cancer
  4. Patients with another somatic disorder
  5. Other clearly defined sample
  6. The source population is not clearly described
- 

2. The sampling frame and recruitment are adequately described:

2A. The participants are recruited through:

1. the general population (with a clear description of the method)
  2. a medical setting, number of hospitals/institutes: ....
  3. another clearly described method
  4. a not clearly described method
- 

2B. The period of inclusion is clearly defined (at least the years are indicated)

1. True
  2. Not true
- 

2C. The geographical location of recruitment is clearly indicated (e.g., the name and city of the hospital, the name of the area)

1. True
  2. Not true
- 

3. Inclusion and exclusion criteria are clearly described:

1. True
  2. Not true
- 

4. Is the study sample an adequate representation of the target population.

1. Yes
  2. No
- 

5. The baseline study sample (individuals entering the study) is adequately described for key characteristics.

1. Yes
  2. No
- 

6. Mortality data at follow-up are available for at least 90% of the baseline sample:

1. True
  2. Not true
  3. Unclear
- 

7. Attempts to collect information on participants who dropped out of the study are described.

1. Yes
  2. No dropout
  3. No
  4. Unclear
- 

8. Reasons for drop-out from baseline to follow-up are provided.

1. Yes
2. No dropout

- 3. No
- 4. Unclear

---

9. Participants who dropped out are adequately described for key characteristics (including at least the number of depressed people).

- 1. Yes
- 2. No dropout
- 3. No
- 4. Unclear

---

10.A. It is clearly reported what was done to assure the mortality status of participants.

- 1. True
- 2. Not true

---

10.B. The follow-up period for which mortality is measured is clearly described.

- 1. True
- 2. Not true

---

11.A. Have the following confounders been measured: Demographic variables

- 1. Yes
- 2. No

---

11.B. Have the following confounders been measured: One or more lifestyle variables (smoking, BMI, exercise)

- 1. Yes
- 2. No

---

11.C. Have the following confounders been measured: One or more illness-related variables (severeness of the illness, somatic comorbidity, characteristics of the illness, etc)

- 1. Yes
- 2. No

---

12. Have analyses been conducted to examine the influence of the confounders described in 11. on the association between depression and mortality (usually through multivariable analyses):

- 1. Yes, all three groups of relevant confounders have been examined in multivariable analyses.
- 2. One or two groups of confounders has been examined in multivariable analyses
- 3. No confounders were included in the analyses
- 4. No confounders were reported in question 11.

---

13. The analyses have been conducted adequately. There are two possibilities:

- This is a prospective study in a population. In these studies survival analyses are conducted.
- This is a case-control study. In these studies logistic regression analyses have been conducted.

Have these analyses been conducted?

- 1. Yes
- 2. No

After the scoring the studies were rated on the main five main areas using the following rules

Q1. Study participation (item 1 -5)

The study sample represents the population of interest on key characteristics, sufficient to limit potential bias to the results.

- Yes (5 items are positive)
- Partly (3-4 items are positive)
- No (0-2 items are positive)

Item 1. This item is positive if one of the answers 1 – 5 is given (6 is negative)

Item 2. This item is positive if 2A to 2C are all positive (not 2A.4, 2B.2, or 2C.2)

Item 3. This item is positive when 1 is chosen  
Item 4. This item is positive when 1 is chosen  
Item 5. This item is positive when 1 is chosen

---

Q2. Study attrition (Item 6 – 9)

Loss to follow-up (from sample to study population) is not associated with key characteristics (i.e., the study data adequately represent the sample), sufficient to limit potential bias.

- Yes (4 items are positive)
- Partly (2-3 items are positive)
- No (0 or 1 items are positive)
- Unclear

Item 6. This item is positive when 1 is chosen  
Item 7. This item is positive when 1 or 2 is chosen  
Item 8. This item is positive when 1 or 2 is chosen  
Item 9. This item is positive when 1 or 2 is chosen

---

Q3. Outcome measurement (item 10)

The outcome of interest is adequately measured in study participants to sufficiently limit potential bias.

- Yes (2 sub-items are positive)
- Partly (1 sub-item is positive)
- No (0 sub-items are positive)
- Unclear

Item 10.A. This item is positive when 1 is chosen  
Item 10.B. This item is positive when 1 is chosen

---

Q4. Confounding measurement and account (item 11 -12)

Important potential confounders are appropriately accounted for, limiting potential bias with respect to the prognostic factor of interest.

- Yes (all 3 groups of confounders have been measured and accounted for; 11.A-C are positive and 12 has score 1)
- Partly (1-2 groups of confounders have been measured and accounted for; at least one of 11.A-C is positive, and 12 has score 2)
- No (all other ratings)

Item 11.A. This item is positive when 1 is chosen  
Item 11.B. This item is positive when 1 is chosen  
Item 11.C. This item is positive when 1 is chosen

---

Q5. Analysis (item 13)

The statistical analysis is appropriate for the design of the study, limiting potential for presentation of invalid results.

- Yes (adequate analyses)
- No
- Unsure

Item 13. This item is positive when 1 is chosen

## Appendix D. Selected characteristics of included studies

|                  | Patient group                                                                 | Recruitment                                                                                        | Definition of depression             | Total N | % de-pressed | FU period <sup>a)</sup> | Country | Quality <sup>b)</sup> |    |    |    |    |
|------------------|-------------------------------------------------------------------------------|----------------------------------------------------------------------------------------------------|--------------------------------------|---------|--------------|-------------------------|---------|-----------------------|----|----|----|----|
|                  |                                                                               |                                                                                                    |                                      |         |              |                         |         | Q1                    | Q2 | Q3 | Q4 | Q5 |
| Abbatecola, 2011 | Patient admitted to geriatric hospitals                                       | Patients admitted to hospital network                                                              | GDS-15 $\geq$ 10                     | 1533    | NR           | 2 yrs                   | ITALY   | ±                     | ±  | +  | -  | -  |
| Adams, 2012      | Patients with Chronic Heart Failure                                           | All patients were invited                                                                          | BDI $\geq$ 19                        | 985     | 29.9         | 12 yrs                  | US      | ±                     | +  | +  | ±  | +  |
| Ahto, 2007       | Community residents                                                           | All residents of community were invited                                                            | SDS $\geq$ 45                        | 660     | 15.2         | 12                      | FINL    | +                     | +  | +  | -  | -  |
| Akechi, 2009     | Patients with non-small cell lung cancer                                      | Consecutive patients in treatment center                                                           | MDD (SCID)                           | 122     | NR           | 2                       | JAPAN   | +                     | +  | ±  | ±  | +  |
| Almagro, 2002    | COPD patients                                                                 | Consecutive patients hospitalized for COPD                                                         | Yesavage scale $\geq$ 11             | 135     | NR           | 2                       | SPAIN   | +                     | -  | +  | +  | +  |
| Almeida, 2010    | Men (68-88)                                                                   | Community                                                                                          | GDS-15 $\geq$ 7                      | 5276    | 5.6          | 6                       | AUSTR   | +                     | +  | +  | +  | +  |
| Amador, 2006     | Mexican American men (65 and older)                                           | Community sample (EPESE)                                                                           | CES-D $\geq$ 16                      | 1749    | 11.5         | 5                       | US      | ±                     | ±  | +  | +  | +  |
| Ang, 2005        | Patients with Rheumatoid Arthritis                                            | Consecutive outpatients with RA                                                                    | AIMS depression scale $\geq$ 4       | 1290    | 17.6         | 18                      | US      | +                     | +  | +  | ±  | +  |
| Anstey, 2002     | Older community residents ( $\geq$ 70)                                        | Selection from electoral roll                                                                      | CES-D $\geq$ 16                      | 1914    | 15.2         | 8                       | AUS     | +                     | +  | +  | +  | +  |
| Arfken, 1999     | Medically ill older adults ( $\geq$ 60)                                       | Consecutive patients admitted to rehabilitation hospital                                           | GDS $\geq$ 17                        | 667     | 10.0         | 1                       | US      | +                     | +  | +  | ±  | +  |
| Ariaratnam, 2008 | Newly diagnosed treatment-naive cancer patients                               | Patients from university hospital                                                                  | Based on HADS (cut-off not reported) | 78      | NR           | 1,5                     | MAL     | ±                     | -  | ±  | ±  | +  |
| Aromaa, 1994     | Adults ( $\geq$ 40)                                                           | Random community sample                                                                            | Depressive disorder (PSE)            | 5355    | 5.4          | 6.6                     | FINL    | ±                     | +  | +  | -  | +  |
| Arrieta, 2012    | Patients with Advanced Non-small Cell Lung Cancer                             | Consecutive patients                                                                               | HADSD $\geq$ 8                       | 82      | 32.9         | 0.5 yrs                 | MEX     | +                     | +  | -  | +  | +  |
| Arve, 1998       | Older adults from one city (Turku)                                            | Random community sample                                                                            | DSM-III                              | 847     | 2.7          | 5                       | FINL    | ±                     | +  | +  | -  | +  |
| Atlantis, 2011   | Older adults ( $\geq$ 65)                                                     | Community                                                                                          | PAS-d $\geq$ 5                       | 1000    | 7.4          | 12                      | AUS     | +                     | +  | +  | +  | +  |
| Baker, 2001      | Patients who underwent CABG surgery                                           | Consecutive patients                                                                               | DASS $\geq$ 10                       | 158     | 15.2         | 2                       | AUS     | ±                     | +  | +  | ±  | -  |
| Baldwin, 2006    | Older patients ( $\geq$ 60) with late-onset depression, with matched controls | Referred patients to psychiatric services, and controls (spouses and responders to advertisements) | MDD (DSM-IV)                         | 85      | 58.8         | 3.1                     | UK      | -                     | +  | +  | -  | -  |

|                  | Patient group                                                 | Recruitment                                                                        | Definition of depression                                              | Total N | % de-pressed | FU period <sup>a)</sup> | Country | Quality <sup>b)</sup> |    |    |    |    |
|------------------|---------------------------------------------------------------|------------------------------------------------------------------------------------|-----------------------------------------------------------------------|---------|--------------|-------------------------|---------|-----------------------|----|----|----|----|
|                  |                                                               |                                                                                    |                                                                       |         |              |                         |         | Q1                    | Q2 | Q3 | Q4 | Q5 |
| Balogun, 2011    | Older patients treated for chronic hemodialysis ( $\geq 65$ ) | All patients in 4 treatment centers                                                | GDS-15 $\geq 5$                                                       | 77      | 33.8         | 5                       | US      | ±                     | +  | ±  | -  | +  |
| Barefoot, 1996   | Coronary artery disease patients                              | Consecutive patients to University hospital                                        | SDS $\geq 60$                                                         | 1250    | 11.2         | 15.2                    | US      | ±                     | ±  | +  | -  | +  |
| Barry, 2008      | Community dwelling older adults ( $\geq 70$ )                 | Members of a health plan                                                           | CES-D $\geq 20$                                                       | 754     | 13.3         | 6                       | US      | +                     | -  | +  | -  | -  |
| Batterham, 2012  | Older adults (> 70 years)                                     | Community                                                                          | GDAS $\geq 4$                                                         | 865     | 13.0         | 17 yrs                  | AUSTR   | ±                     | +  | +  | ±  | +  |
| Ben-Arie, 1990   | Older adults ( $\geq 65$ years)                               | Community sample                                                                   | Depressive disorder (PSE)                                             | 150     | 15.3         | 3.5                     | S-AFR   | ±                     | ±  | ±  | -  | -  |
| Ben-Ezra, 2006   | Older adults (75-94 years)                                    | Random sample from population registry                                             | CES-D $\geq 16$                                                       | 1316    | 54.6         | 12                      | ISR     | +                     | +  | +  | ±  | +  |
| Billig, 1988     | Older patients ( $\geq 60$ years) with hip fracture           |                                                                                    | MDD (DSM-III, diagnostic interview) + SDS $\geq 50$ + GHQ-28 $\geq 5$ | 35      | 33,3         | 0,5                     | US      | ±                     | ±  | ±  | -  | -  |
| Black, 1999      | Mexican Americans over 65                                     | Probability sample from 5 US states                                                | CES-D $\geq 16$                                                       | 2489    | 23.6         | 2                       | US      | +                     | -  | ±  | ±  | -  |
| Blazer, 1982     | Older adults ( $\geq 65$ )                                    | Representative sample from the general population in Durham County, North Carolina | OARS Depression scale (cut-off not given)                             | 331     | NR           | 2.5                     | US      | +                     | +  | +  | +  | -  |
| Blumenthal, 2003 | Patients undergoing CABG                                      | patients scheduled for elective CABG surgery University Medical Center             | CES-D $\geq 16$                                                       | 817     | 37.9         | 12                      | US      | +                     | +  | +  | +  | +  |
| Borowicz, 2002   | Patients for coronary artery bypass surgery                   | Hospitalized patients                                                              | CES-D $\geq 16$                                                       | 172     | 24,8         | 5                       | US      | -                     | +  | +  | -  | -  |
| Boscarino, 2008  | Men                                                           | Random sample of men who served in the US Army during the Vietnam war              | Lifetime depressive disorder (DIS)                                    | 4462    | 10.5         | 15                      | US      | +                     | +  | +  | ±  | +  |
| Bosworth, 1999   | Patients with suspected or known coronary artery disease      | Patients referred to medical center                                                | CES-D $\geq 16$                                                       | 2885    | NR           | 3.5                     | US      | +                     | +  | ±  | ±  | +  |
| Bot, 2012        | Older adults from the community                               | Patients from 4 hospitals were screened                                            | Goldberg depression scale $\geq 4$                                    | 2525    | 25.4         | 6.2                     | NL      | ±                     | ±  | +  | +  | +  |
| Boulware, 2006   | Incident dialysis patients (19-95s)                           | national prospective cohort study from 81 dialysis clinics                         | MHI-5 $\leq 52$                                                       | 917     | 24.1         | 2                       | US      | +                     | +  | +  | +  | +  |

|                | Patient group                                           | Recruitment                                                                      | Definition of depression                                       | Total N | % de-pressed | FU period <sup>a)</sup> | Country | Quality <sup>b)</sup> |    |    |    |    |
|----------------|---------------------------------------------------------|----------------------------------------------------------------------------------|----------------------------------------------------------------|---------|--------------|-------------------------|---------|-----------------------|----|----|----|----|
|                |                                                         |                                                                                  |                                                                |         |              |                         |         | Q1                    | Q2 | Q3 | Q4 | Q5 |
| Brill, 1992    | Men                                                     | Men given at least one preventive medical examination                            | Depression scale of Clinical Analysis Questionnaire $\geq 5.5$ | 406     | 21,2         | NR                      | US      | ±                     | +  | -  | -  | -  |
| Bruce, 1994    | Men and women older than 40                             | Random sample from the community                                                 | MDD (DIS)                                                      | 3560    | 1.9          | 9                       | US      | ±                     | +  | +  | -  | +  |
| Bruce, 2005    | Diabetes II patients                                    | Diabetes patients from the general population                                    | $\geq 2$ GHS symptoms of depression                            | 1273    | 31.5         | 7.8                     | AU      | +                     | +  | +  | +  | +  |
| Buccheri, 1998 | Patients with bronchogenic carcinoma                    | Consecutive patients in specialist tertiary hospital                             | Zung Self-Rating Depression Scale $\geq 51$                    | 95      | 44.2         | 2                       | ITA     | +                     | +  | +  | ±  | +  |
| Bula, 2001     | Older patients ( $\geq 75$ )                            | patients admitted to the internal medicine service of an academic medical center | GDS-15 $\geq 6$                                                | 401     | 22.4         | 0,5                     | SWITS   | ±                     | +  | +  | ±  | +  |
| Burack, 1993   | Male HIV patients                                       | Recruited from community (SFMHS study)                                           | CES-D $\geq 16$                                                | 330     | 19.7         | 5.5                     | US      | +                     | -  | +  | ±  | +  |
| Burg, 2003     | Men who had Coronary Artery Bypass Graft Surgery (CABG) | consecutive male patients admitted for nonemergent CABG                          | BDI $\geq 10$                                                  | 89      | 28.1         | 2                       | US      | +                     | +  | +  | -  | -  |
| Bush, 2001     | Myocardial infarction patients                          | Consecutive patients admitted to hospital                                        | MDD (SCID) and BDI $\geq 10$                                   | 285     | 17.2         | 0.33                    | US      | +                     | +  | +  | ±  | -  |
| Butler, 2004   | Dementia patients                                       | Recruited through day centers and psychogeriatric unit                           | Depressive disorder (GMS)                                      | 166     | NR           | 0,5                     | NW ZL   | ±                     | +  | +  | -  | +  |
| Callahan, 1998 | Older adults ( $\geq 60$ )                              | Patients visiting their GP                                                       | CES-D $\geq 16$                                                | 3767    | 16.2         | 3.75                    | US      | +                     | +  | +  | +  | +  |
| Carney, 1988   | Coronary artery disease patients                        | Recruited from patients undergoing cardiac catheterization                       | MDD (DIS)                                                      | 52      | 17.3         | 1                       | US      | ±                     | -  | +  | -  | -  |
| Chen, 2011     | Patients with advanced non-small cell lung cancer       | Consecutive patients                                                             | HADS $\geq 8$                                                  | 90      | 22.2         | 2.5 yrs                 | TAIWAN  | ±                     | +  | ±  | +  | +  |
| Chilcot, 2011  | end-stage renal disease patients                        | Incident patients from 3 renal centers                                           | BDI-II $\geq 16$                                               | 160     | 25.6         | 1.4                     | UK      | +                     | ±  | +  | -  | +  |
| Chung, 2009    | Patients with heart failure                             | Recruited from outpatient clinics                                                | BDI-II $\geq 14$                                               | 166     | 33.1         | 4                       | US      | ±                     | +  | +  | -  | +  |
| Clausen, 2007  | Older adults ( $\geq 60$ )                              | National representative household survey                                         | MADRS $> 20$                                                   | 372     | 6.8          | 0.57                    | BOTSW   | +                     | ±  | +  | ±  | -  |
| Clouse, 2003   | Women with diabetes                                     | Random selection of patients from a diabetes registry                            | MDD (DIS; DSM-III)                                             | 76      | 21.1         | 10                      | US      | +                     | ±  | +  | -  | -  |
| Cohen, 2012    | Patients with Renal Cell Carcinoma                      | Newly diagnosed patients                                                         | CESD $\geq 16$                                                 | 217     | 23.0         | 7.5 yrs                 | US      | +                     | +  | ±  | ±  | +  |



|                        | Patient group                                                             | Recruitment                                                       | Definition of depression                                                               | Total N | % de-pressed                     | FU period <sup>a)</sup> | Country | Quality <sup>b)</sup> |       |       |       |    |
|------------------------|---------------------------------------------------------------------------|-------------------------------------------------------------------|----------------------------------------------------------------------------------------|---------|----------------------------------|-------------------------|---------|-----------------------|-------|-------|-------|----|
|                        |                                                                           |                                                                   |                                                                                        |         |                                  |                         |         | Q1                    | Q2    | Q3    | Q4    | Q5 |
| Connerney, 2010        | Coronary artery bypass surgery patients                                   | Hospital patients                                                 | Current or past MDD (modified DIS), BDI $\geq$ 10                                      | 309     | MDD: 20.4<br>BDI $\geq$ 10: 28.2 | 10                      | US      | +                     | +     | +     | +     | +  |
| Corruble, 2011         | Patients with liver or kidney transplantation                             | Patients on waiting list                                          | .                                                                                      | 339     | 51.6                             | 1.5 yrs                 | FRANCE  | +                     | +     | +     | +     | -  |
| Corsonello, 2011       | Chronic kidney disease patients                                           | Patients participating in longitudinal study                      | GDS-15 (cut-off value not reported)                                                    | 439     | NR                               | 1                       | Italy   | $\pm$                 | +     | +     | -     | +  |
| Damen, 2013            | patients treated with percutaneous coronary intervention                  | Consecutive hospital patients                                     | HADS $\geq$ 8                                                                          | 1234    | 26.3                             | 7 yrs                   | NL      | +                     | +     | +     | +     | +  |
| Davidson, 1988         | Older adults ( $\geq$ 65)                                                 | Random community sample                                           | Depressive disorder (GMS/AGECAT)                                                       | 1054    | 11.2                             | 3                       | UK      | $\pm$                 | +     | $\pm$ | -     | -  |
| De Guevara, 2004       | Older patients ( $\geq$ 60) with myocardial infarction or unstable angina | Patients admitted to coronary care unit                           | MDD (DSM-IV; interview by psychiatrist)                                                | 38      | 34.2                             | 0,5                     | ARGENT  | +                     | -     | $\pm$ | -     | -  |
| De la Camara, 2008     | Older adults                                                              | Sample from general population                                    | Depressive disorder (MDD, minD) according to AGECAT                                    | 663     | 6.6 (MDD)                        | 4,5                     | SPAIN   | -                     | -     | $\pm$ | -     | -  |
| De Schutter, 2011      | Coronary heart disease patients                                           | Retrospective patient sample                                      | KSQ-d $\geq$ 7                                                                         | 538     | 6.7                              | 3 yrs                   | US      | -                     | $\pm$ | +     | $\pm$ | -  |
| de Voogd, 2009A; 2009B | COPD patients                                                             | Patients referred for pulmonary rehabilitation                    | BDI $\geq$ 19                                                                          | 121     | 19.8                             | 8.5                     | NL      | +                     | +     | +     | +     | +  |
| Denollet, 1995         | Patients who had experienced a myocardial infarction (45-60s)             | Consecutive patients enrolled in a cardiac rehabilitation program | Scoring above the median on 2 depression subscales of the MBHI                         | 105     | 46.7                             | 3.8                     | BELG    | $\pm$                 | +     | +     | -     | -  |
| Denollet, 1996         | Patients who had experienced a myocardial infarction (31-79s)             | Consecutive patients enrolled in a cardiac rehabilitation program | MBHI premorbid perssism subscale $\geq$ 10 and cognitive depression subscale $\geq$ 12 | 303     | 41.9                             | 7.9                     | BELG    | +                     | +     | +     | -     | -  |
| Denollet, 2009         | Women (46 -54 years)                                                      | Community sample (Eindhoven Perimenopausal Osteoporosis Study)    | EDS $\geq$ 12                                                                          | 5073    | NR                               | 10                      | NL      | +                     | +     | +     | +     | +  |
| Diefenthaler, 2008     | Chronic hemodialysis patients                                             | All patients from a dialysis site                                 | BDI $\geq$ 14                                                                          | 40      | 55.0                             | 0.9                     | BRAS    | +                     | +     | $\pm$ | $\pm$ | +  |
| Diez-Quevedo, 2012     | Heart failure outpatients                                                 | Patients admitted to specialized outpatient center                | GDS-4 $\geq$ 1                                                                         | 1017    | 41.7                             | 5.4 yrs                 | SPAIN   | $\pm$                 | +     | +     | +     | +  |

|                     | Patient group                                      | Recruitment                                                   | Definition of depression                                | Total N | % depressed                          | FU period <sup>a)</sup> | Country | Quality <sup>b)</sup> |    |    |    |    |
|---------------------|----------------------------------------------------|---------------------------------------------------------------|---------------------------------------------------------|---------|--------------------------------------|-------------------------|---------|-----------------------|----|----|----|----|
|                     |                                                    |                                                               |                                                         |         |                                      |                         |         | Q1                    | Q2 | Q3 | Q4 | Q5 |
| Doyle, 2012         | Patients with Acute Coronary Syndrome              | Consecutive patients in hospitals                             |                                                         | 598     | NR                                   | 8 yrs                   | Ireland | ±                     | +  | +  | +  | +  |
| Drago, 2007         | Patients with acute myocardial infarction          | Consecutive patients admitted in coronary care unit for AMI   | MDD                                                     | 100     | 15.0                                 | 5                       | ITALY   | ±                     | -  | +  | -  | +  |
| Einwohner, 2004     | Peritoneal dialysis patients                       | Patients from 3 dialysis centers                              | SDS ≥ 50                                                | 66      | 31.8                                 | 3                       | US      | +                     | -  | ±  | -  | -  |
| Engedal, 1996       | Older adults (75 and older)                        | Community sample                                              | DSM-III-R (Gurland algorithm)                           | 334     | 15.9                                 | 3                       | NORW    | +                     | +  | +  | +  | -  |
| Enzell, 1984        | People born in 1905                                | Community sample                                              | Positive responses to 5 questions indicating depression | 4930    | 9.7                                  | 9                       | SWED    | ±                     | -  | +  | -  | -  |
| Espauella, 2007     | frail elderly patients admitted to post-acute care | Hospital patients                                             | GDS-15 > 5                                              | 165     | NR                                   | 0,5                     | SPAIN   | ±                     | ±  | +  | +  | +  |
| Evans, 1993         | Physically ill older inpatients                    | Random sample of acute admissions to a geriatric medical ward | Depressive disorder (GMS/AGECAT)                        | 72      | 31.9                                 | 1                       | UK      | -                     | ±  | ±  | -  | -  |
| Everson-Rose, 2004  | Adults (25 and older)                              | Community sample                                              | Highest 20% of CES-D score                              | 3617    | 20.0                                 | 7,5                     | US      | ±                     | +  | +  | +  | +  |
| Faller, 2007        | Patients with chronic heart failure                | Consecutive patients to university hospital                   | Probable MDD and minD (based on PHQ-9)                  | 231     | MDD: 13.4<br>minD: 16.5<br>any: 29.9 | 2.8                     | GERM    | ±                     | +  | +  | ±  | +  |
| Favaro, 2011        | heart transplantation recipients                   | Hospital patients 8,4                                         | MDD (SCID)                                              | 107     | 8,4                                  | 8                       | Italy   | +                     | +  | ±  | +  | +  |
| Feng, 2012          | Older Adults With Chronic Kidney Disease           | Community sample                                              | GDS-15 ≥ 5                                              | 362     | 13.0                                 | 4 yrs                   | SING    | +                     | +  | ±  | +  | -  |
| Ford, 1998          | Male medical students                              | Follop-up of medical students                                 | Self-report confirmed by clinicians                     | 1190    | 11.1                                 | 37                      | US      | +                     | +  | +  | +  | +  |
| Fortes, 2012        | very elderly people                                | Residential home for the elderly                              | GDS-15 ≥ 7                                              | 147     | 42.2                                 | 10 yrs                  | ITALY   | +                     | +  | +  | ±  | +  |
| Frasure-Smith, 1995 | patients hospitalized for myocardial infarction    | Patients admitted to hospital                                 | MDD (DIS)<br>BDI ≥ 10                                   | 222     | 15.8                                 | 1,5                     | CA      | +                     | +  | +  | +  | -  |
| Fredman, 1989       | Adults                                             | Community sample (ECA-Piedmont study)                         | MDD (DIS) and minD (DIS)                                | 1606    | 2,7 (MDD)<br>2,6 (minD)              | 2                       | US      | +                     | +  | +  | ±  | -  |
| Fredman, 1999       | Women                                              | Community sample                                              | CES-D ≥ 16                                              | 764     | 12,8                                 | 6                       | US      | ±                     | +  | +  | ±  | +  |
| Freedland, 1991     | Older congestive heart failure patients            | Consecutive inpatients                                        | MDD (DIS; DSM-III-R)                                    | 60      | 16.7                                 | 1                       | US      | ±                     | +  | +  | -  | -  |

|                   | Patient group                                                    | Recruitment                                                          | Definition of depression                                                       | Total N | % depressed                                 | FU period <sup>a)</sup> | Country  | Quality <sup>b)</sup> |    |       |       |    |
|-------------------|------------------------------------------------------------------|----------------------------------------------------------------------|--------------------------------------------------------------------------------|---------|---------------------------------------------|-------------------------|----------|-----------------------|----|-------|-------|----|
|                   |                                                                  |                                                                      |                                                                                |         |                                             |                         |          | Q1                    | Q2 | Q3    | Q4    | Q5 |
| French, 2009      | Women with HIV                                                   | Patients from 6 cities                                               | CES-D $\geq$ 16                                                                | 2792    | 52.9                                        | 10                      | US       | -                     | +  | +     | +     | +  |
| Fu, 2003          | Older adults                                                     | Community sample                                                     | CES-D $\geq$ 15                                                                | 281     | 50.3                                        | 12                      | TAIW     | +                     | +  | +     | $\pm$ | +  |
| Fuhrer, 1999      | Older adults (65 and older)                                      | Community sample                                                     | CES-D $\geq$ 17 in men and $\geq$ 23 in women                                  | 3777    | 13.9                                        | 5                       | FRANCE   | +                     | +  | +     | +     | +  |
| Gale, 2012        | Military service                                                 | Community sample                                                     | ICD                                                                            | 1095338 | 0.9                                         | 18.3                    | SWE      | $\pm$                 | +  | $\pm$ | +     | +  |
| Gallo, 1997       | Adults (50 and older)                                            | Community sample (ECA Baltimore)                                     | MDD (DIS) Nondysphoric depression Sadness                                      | 1612    | MDD: 2.1<br>Nondysph : 5.9<br>Sadness: 11.4 | 13                      | US       | +                     | -  | $\pm$ | $\pm$ | +  |
| Ganzini, 1997     | Medically ill older adults ( $\geq$ 65)                          | Veterans recruited from inpatient and surgical units                 | MDD (as diagnosed by a psychiatrist) + GDS-30 $\geq$ 14                        | 100     | 50.0                                        | 2.5                     | US       | $\pm$                 | +  | +     | $\pm$ | +  |
| Grace, 2005       | Patients with unstable angina pectoris and myocardial infarction | Patients from 12 coronary care units                                 | BDI > 10                                                                       | 750     | 23.2                                        | 5                       |          | +                     | +  | +     | +     | +  |
| Gripp, 2007       | Terminally ill cancer patients                                   | Patients from Radiation Oncology Department of a University Hospital | HADS-D > 10                                                                    | 154     | 28,6                                        | 0,5                     | GERM     | $\pm$                 | +  | +     | -     | +  |
| Groenvold, 2007   | Primary breast cancer patients                                   | Cancer treatment center                                              | HADS-D $\geq$ 10                                                               | 1588    | NR                                          | 12,9                    | DENM     | $\pm$                 | -  | $\pm$ | $\pm$ | +  |
| Grool, 2012       | Patients With Lacunar Infarcts                                   | Referrals to University hospital                                     | lowest quartile on SF-36-MCS                                                   | 1281    | 25.0                                        | 6 yrs                   | NL       | $\pm$                 | +  | +     | +     | +  |
| Gudmundsson, 2012 | patients hospitalized for chronic obstructive pulmonary disease  | Hospital patients                                                    | HADSD                                                                          | 256     | 9.0                                         | 8.7 yrs                 | NORDIC C | $\pm$                 | +  | +     | +     | +  |
| Guerini, 2010     | elderly patients after orthopaedic surgery of the lower limbs    | elderly patients discharged from a rehabilitation unit               | GDS-15 $\geq$ 11                                                               | 222     | 5.9                                         | 1                       | Italy    | $\pm$                 | +  | +     | $\pm$ | -  |
| Hamer, 2011       | Older adults ( $\geq$ 65)                                        | Community sample                                                     | GDS-15 $\geq$ 5                                                                | 1007    | 20.9                                        | 9,2                     | UK       | +                     | +  | +     | +     | +  |
| Haukkala, 2009    | Adults (25-74)                                                   | Community sample                                                     | BDI-II > 12                                                                    | 7710    | 25.0                                        | 10-15                   | FINL     | $\pm$                 | -  | +     | +     | +  |
| Havik, 2007       | Heart transplantation patients                                   | Patients who came for annual medical evaluation                      | BDI $\geq$ 10                                                                  | 147     | 24.5                                        | 5                       | NORW     | +                     | +  | +     | +     | +  |
| Hayashi, 2007     | Older patients ( $\geq$ 70 years)                                | Consecutive patients in geriatric outpatient clinics                 | Depression according to DSM-IV, antidepressant prescription of GDS-15 $\geq$ 8 | 150     | 21.9                                        | 2,75                    | JAPAN    | $\pm$                 | +  | $\pm$ | -     | -  |
| Hedayati, 2004    | Congestive heart failure patients                                | Consecutive patients of cardiac treatment center                     | MDD (DIS) + BDI $\geq$ 10                                                      | 326     | 14.1                                        | 1                       | US       | +                     | +  | +     | $\pm$ | -  |

|                       | Patient group                                         | Recruitment                                                          | Definition of depression                          | Total N | % depressed              | FU period <sup>a)</sup> | Country | Quality <sup>b)</sup> |    |    |    |    |
|-----------------------|-------------------------------------------------------|----------------------------------------------------------------------|---------------------------------------------------|---------|--------------------------|-------------------------|---------|-----------------------|----|----|----|----|
|                       |                                                       |                                                                      |                                                   |         |                          |                         |         | Q1                    | Q2 | Q3 | Q4 | Q5 |
| Hedayati, 2010.       | Chronic kidney disease patients                       | Consecutive outpatients                                              | MDD (MINI)                                        | 267     | 21.0                     | 1                       | US      | +                     | +  | +  | ±  | +  |
| Helmer, 1999          | Older adults (≥ 65)                                   | Community sample                                                     | CES-D ≥ 16 for men and ≥ 22 for women             | 3561    | 13.1                     | 5                       | FRANCE  | +                     | +  | +  | +  | +  |
| Henderson, 1997       | Older adults (≥ 70 years)                             | Community sample                                                     | MDD and dysth (CIE/diagnostic interview; DSM-IV)  | 1045    | 3.1                      | 3.6                     | AUSTR   | +                     | ±  | -  | -  | -  |
| Herrmann-Lingen, 2001 | Medical inpatients                                    | Consecutive patients of general medical wards of university hospital | HADS-D > 8                                        | 575     | 21.7                     | 1                       | GERM    | ±                     | +  | +  | +  | +  |
| Herrmann, 1998        | Medical inpatients                                    | Consecutive patients of general medical wards of university hospital | HADS-D > 8                                        | 452     | 23.9                     | 1.8                     | GERM    | +                     | +  | +  | ±  | +  |
| Hjaltadottir, 2011    | nursing home residents                                | patients admitted to nursing home                                    | DRS <sub>≥14</sub>                                | 2194    | 2.4                      | 3 yrs                   | ICEL    | ±                     | +  | +  | ±  | +  |
| Ho, 2005              | Patients undergoing cardiac valve surgery             | Patients from 14 medical centers                                     | MHI ≤ 52                                          | 648     | 29.2                     | 0,5                     | US      | ±                     | -  | +  | ±  | -  |
| Hoch, 1993            | Patients with depression, dementia, mixed illnesses   | Case control study; majority from geropsychiatric inpatient unit     | MDD (SADS; DSM-III / RDC)                         | 102     | 50.0                     | 2                       | US      | -                     | ±  | ±  | +  | +  |
| Holmes, 2000          | Older hip fracture patients                           | Patients from 2 hospitals                                            | Depressive disorder (GMS/AGECAT)                  | 731     | 12.7                     | 0,5                     | UK      | +                     | +  | +  | ±  | +  |
| Hosseini, 2011        | Patients hospitalized for acute myocardial infarction | Consecutive patients in cardiac units in one province of Iran        | BDI ≥ 10                                          | 540     | 65.6                     | 2                       | Iran    | +                     | +  | ±  | +  | -  |
| Hughes, 2004          | Patients with Parkinson's disease and control group   | Case control study, with controls recruited from several sources     | MADRS ≥ 20                                        | 140     | 33.6                     | 11                      | UK      | ±                     | +  | +  | ±  | +  |
| Imai, 2012            | Older community dwelling adults                       | Community sample                                                     | GDS-15 <sub>≥6</sub>                              | 1600    | 34.4                     | 4 yrs                   | JAP     | -                     | -  | +  | ±  | +  |
| Inouye, 1998          | Oler hospitalized patients (≥ 70 years)               | Consecutive patients at general medical wards of a hospital          | GDS-15 ≥ 7                                        | 207     | 18.4                     | 2                       | US      | +                     | +  | +  | ±  | +  |
| Ismail, 2007          | Patients with their first diabetic foot ulcer         | Recruiting from general population                                   | MDD and minD (SCAN / DSM-IV)                      | 253     | MDD: 24.1<br>minD: 8.1   | 1.5                     | UK      | +                     | +  | +  | +  | +  |
| Iversen, 2009         | Adults (≥ 20 years)                                   | Recruiting from general population                                   | HADS-D ≥ 8                                        | 64109   | 10.9                     | 10                      | NORW    | +                     | -  | ±  | +  | +  |
| Janzing, 1999         | Dementia patients                                     | Inhabitants of residential homes for the elderly                     | Depressive disorder and subthreshold (GMS/AGECAT) | 73      | DD: 15.1<br>Subthr: 28.8 | 1                       | NL      | ±                     | -  | ±  | ±  | -  |

|                          | Patient group                                        | Recruitment                                                                          | Definition of depression                                                 | Total N | % depressed                      | FU period <sup>a)</sup> | Country | Quality <sup>b)</sup> |       |       |       |    |
|--------------------------|------------------------------------------------------|--------------------------------------------------------------------------------------|--------------------------------------------------------------------------|---------|----------------------------------|-------------------------|---------|-----------------------|-------|-------|-------|----|
|                          |                                                      |                                                                                      |                                                                          |         |                                  |                         |         | Q1                    | Q2    | Q3    | Q4    | Q5 |
| Jiang, 2001              | Congestive heart failure patients                    | patients admitted to cardiology service at hospital                                  | MDD (DIS) + BDI $\geq$ 10                                                | 374     | MDD: 13.9<br>BDI $\geq$ 10: 16.3 | 1                       | US      | +                     | +     | +     | -     | +  |
| Jiang, 2007              | Congestive heart failure patients                    | patients admitted to cardiology service at hospital                                  | MDD (DIS) + BDI $\geq$ 10                                                | 1006    | 30.0                             | 2.7                     | US      | +                     | +     | +     | $\pm$ | +  |
| Jorm, 1991               | Older adults ( $\geq$ 70 years)                      | Community sample                                                                     | MDD and dysphoric mood (GMS / DSM-III)                                   | 228     | MDD: 14.5<br>dysphoric : 30.7    | 5                       | AUSTR   | $\pm$                 | $\pm$ | +     | -     | -  |
| Joukamaa, 2001           | Adults ( $\geq$ 30 years)                            | Community sample                                                                     | Neurotic depression (PSE)                                                | 7217    | 4.7                              | 16                      | FINL    | +                     | -     | +     | $\pm$ | +  |
| Jubran, 2010             | during weaning from prolonged mechanical ventilation | Patients from one hospital                                                           | Depressive disorder (DSM-IV)                                             | 336     | 42,3                             | NR                      | US      | $\pm$                 | -     | -     | $\pm$ | -  |
| Junger, 2005             | Congestive heart failure patients                    | Hospital patients                                                                    | HADS-D $\geq$ 8                                                          | 209     | 30.1                             | 2.07                    | GERM    | $\pm$                 | +     | +     | $\pm$ | +  |
| Kaplan, 2007             | Adults                                               | Community sample (Alameda county)                                                    | Depression scale $\geq$ 5                                                | 6928    | NR                               | 30                      | US      | +                     | -     | +     | $\pm$ | -  |
| Karvonen-Gutierrez, 2008 | Head and neck cancer patients                        | Patients from 4 hospitals                                                            | GDS (not clear which version) $\geq$ 4                                   | 495     | 47.8                             | 6                       | US      | $\pm$                 | +     | +     | +     | +  |
| Kato, 2009               | Heart failure patients                               | Outpatients from hospital                                                            | CES-D $\geq$ 16                                                          | 115     | 23.5                             | 2                       | JAP     | +                     | +     | +     | -     | +  |
| Katon, 2005              | Patients with Type 2 Diabetes                        | Patients from HMO                                                                    | PHQ-MDD, PHQ-minD                                                        | 4154    | PHQ-MDD: 12.0<br>PHQ-minD: 8.5   | 3                       | US      | +                     | -     | +     | +     | +  |
| Katz, 1989               | Nursing home residents                               | Inhabitants of long-term care units                                                  | MSQ $\geq$ 6 and MDD (SADS; DSM-III)                                     | 51      | 15.7                             | 2.75                    | US      | -                     | -     | +     | -     | -  |
| Kaufmann, 1999           | Acute myocardial infarction patients                 | Consecutive patients in hospital                                                     | MDD (modified DIS)                                                       | 331     | 28.0                             | 1                       | US      | +                     | -     | $\pm$ | $\pm$ | -  |
| Kawamura, 2007           | Older adults ( $\geq$ 65 years)                      | Community sample                                                                     | MDD or minD (RDC criteria)                                               | 920     | 17.2                             | 15                      | JAP     | $\pm$                 | $\pm$ | +     | $\pm$ | -  |
| Kerr, 2011               | Adults ( $\geq$ 18)                                  | Community sample (NAS 1984 and 1995); minorities oversampled                         | CESD $\geq$ 16                                                           | 9994    | 17.9                             | 16,5                    | US      | +                     | -     | +     | $\pm$ | +  |
| Koenig, 1998             | Inpatients admitted to hospital                      | Consecutive patients admitted to general medicine, cardiology and neurology services | MDD (DIS; DSM-IV) + CES-D $\geq$ 16 + HAMD $\geq$ 11; minD (DIS; DSM-IV) | 542     | 29.0                             | 0,9                     | US      | +                     | -     | $\pm$ | $\pm$ | +  |

|                  | Patient group                                                                                               | Recruitment                                                                | Definition of depression                            | Total N | % de-pressed             | FU period <sup>a)</sup> | Country | Quality <sup>b)</sup> |       |       |       |    |
|------------------|-------------------------------------------------------------------------------------------------------------|----------------------------------------------------------------------------|-----------------------------------------------------|---------|--------------------------|-------------------------|---------|-----------------------|-------|-------|-------|----|
|                  |                                                                                                             |                                                                            |                                                     |         |                          |                         |         | Q1                    | Q2    | Q3    | Q4    | Q5 |
| Koenig, 1999     | Hospitalized medically ill male veterans (20-39, and 65-102 years)                                          | Consecutive admissions general medicine and neurology services of hospital | BCDRS $\geq$ 6; GDS-30 $\geq$ 8                     | 1001    | BCDRS: 20.7<br>GDS: 40.3 | 9                       | US      | +                     | +     | +     | +     | +  |
| Kohler, 2013     | older primary care patients (>75)                                                                           | from 138 general practices                                                 | GDS-15 $\geq$ 6                                     | 2854    | 9.1                      | 6 yrs                   | GERM    | +                     | +     | $\pm$ | +     | +  |
| Kojima, 2010     | Chronic Hemodialysis Patients                                                                               | Patients from 3 clinics                                                    | BDI-II $\geq$ 14                                    | 230     | 43,0                     | 5                       | JAP     | +                     | -     | +     | +     | +  |
| Kopp, 2011       | Adults (40-69)                                                                                              | Community sample (Hungarian Epidemiological Panel)                         | BDI-9 $\geq$ 25                                     | 2659    | 16,5                     | 3,5                     | HUNG    | +                     | -     | +     | $\pm$ | +  |
| Kouzis, 1995     | Adults                                                                                                      | Community sample (4 ECA sites)                                             | MDD (DIS)                                           | 15567   | NR                       | 1                       | US      | $\pm$                 | -     | $\pm$ | $\pm$ | -  |
| Krause, 2008     | Patients with spinal cord injury                                                                            | Patients treated for SCI in hospital                                       | OAHMQ $\geq$ 11                                     | 1389    | NR                       | 8                       | US      | +                     | +     | +     | $\pm$ | +  |
| Kronish, 2009    | Patients with acute coronary syndrome                                                                       | Hospitalized patients                                                      | MDD (m-DIS; DSM-IV)                                 | 457     | 10.6                     | 1,5                     | US      | +                     | -     | +     | -     | +  |
| Kuo, 2004        | Older diabetes patients ( $\geq$ 65 years)                                                                  | Medicare beneficiaries                                                     | 3 core questions on depression                      | 8949    | 21.4                     | 2                       | US      | +                     | $\pm$ | +     | +     | -  |
| Kuo, 2011        | elderly with self-reported hypertension                                                                     | Community sample                                                           | CESD17 $\geq$ 15                                    | 3736    | 16.8                     | 18 yrs                  | TAIWAN  | +                     | +     | +     | +     | +  |
| Kurdyak, 2008    | Acute myocardial infarction patients                                                                        | Patients discharged from 53 hospitals                                      | BCDRS-9 $\geq$ 5                                    | 1941    | 25.5                     | 1.5                     | CAN     | +                     | -     | $\pm$ | +     | +  |
| Kuzuya, 2006     | Older adults                                                                                                | Community sample                                                           | GDS-15 $\geq$ 6                                     | 1673    | 43.2                     | 1.75                    | JAP     | +                     | -     | +     | $\pm$ | +  |
| Lacson, 2012     | incident hemodialysis patients                                                                              | Patients admitted to medical center                                        | SF-36-MH2                                           | 6415    | 20.7                     | 1 yr                    | US      | -                     | $\pm$ | $\pm$ | $\pm$ | +  |
| Ladwig, 2005     | Adults (25-74 years)                                                                                        | Community sample                                                           | Zerssen symptom list                                | 13793   | 26.3                     | 11                      | GERM    | $\pm$                 | -     | $\pm$ | +     | +  |
| Lane, 2001       | Myocardial infarction patients                                                                              | Hospitalized patients                                                      | BDI $\geq$ 10                                       | 288     | 30.9                     | 3                       | UK      | +                     | +     | +     | +     | +  |
| Lauzon, 2003     | Myocardial infarction patients                                                                              | Hospitalized patients from 10 hospitals                                    | BDI $\geq$ 10                                       | 550     | 34.7                     | 1                       | CAN     | +                     | +     | +     | +     | +  |
| Lavretsky, 2010  | Older adults ( $\geq$ 50 years)                                                                             | Community and memory clinics                                               | Symptoms of depression                              | 498     | 16.2                     | 12                      | US      | -                     | -     | -     | $\pm$ | +  |
| Lesperance, 2000 | patients with unstable angina who did not require coronary artery bypass surgery before hospital discharge. | Patients from the Montreal Heart Institute                                 | BDI $\geq$ 10                                       | 430     | 41.4                     | 1,5                     | CAN     | +                     | +     | +     | +     | +  |
| Liebetau, 2008   | Older adults (85 years)                                                                                     | All 85 year old people in one city                                         | MDD, DYS, Dep NOS (DSM-III-R; diagnostic interview) | 494     | 18.8                     | 3                       | SWE     | +                     | +     | $\pm$ | +     | +  |

|                | Patient group                                           | Recruitment                                                                     | Definition of depression                        | Total N | % de-pressed | FU period <sup>a)</sup> | Country | Quality <sup>b)</sup> |    |    |    |    |
|----------------|---------------------------------------------------------|---------------------------------------------------------------------------------|-------------------------------------------------|---------|--------------|-------------------------|---------|-----------------------|----|----|----|----|
|                |                                                         |                                                                                 |                                                 |         |              |                         |         | Q1                    | Q2 | Q3 | Q4 | Q5 |
| Lindesay, 1989 | Depressed older adults compared with community controls | Referred patients to psychogeriatric clinic                                     | Depressive disorder (PSE; Feighner criteria)    | 324     | 38.3         | 4                       | UK      | -                     | -  | ±  | -  | -  |
| Lo, 2009       | Parkinson's disease patients                            | Patients from HMO                                                               | UPDRS I, Q3 ≥ 2                                 | 464     | 12.1         | 1                       | US      | +                     | +  | +  | ±  | +  |
| Loberiza, 2002 | Hematopoietic stemcell transplantation patients         | Patients scheduled for transplantation in a hospital                            | Feeling depressed + four or more other symptoms | 193     | 34,7         | 1                       | US      | +                     | -  | ±  | ±  | +  |
| Lupon, 2008    | Heart failure patients                                  | Consecutive patients referred to cardiac unit                                   | GDS-15 (cut-off not reported)                   | 622     | 25.2         | 1                       | SP      | ±                     | +  | +  | -  | +  |
| Luukinen, 2003 | Older adults (≥ 70 years)                               | Community sample                                                                | s-SDS ≥ 28                                      | 915     | 19.1         | 8                       | FINL    | ±                     | -  | +  | -  | +  |
| Luutonen, 2002 | Acute myocardial infarction patients                    | Consecutive patients from 2 hospitals                                           | BDI ≥ 10                                        | 85      | 21.2         | 1,5                     | FINL    | ±                     | -  | ±  | -  | -  |
| Lyketsos, 1996 | Male HIV patients without AIDS                          | Community volunteers                                                            | CES-D ≥ 16                                      | 1718    | 21.2         | 8                       | US      | -                     | -  | ±  | ±  | +  |
| Mainio, 2006   | Patients with brain tumor                               | Patients treated surgically in hospital                                         | BDI ≥ 10                                        | 74      | 21.6         | 12                      | FINL    | ±                     | +  | +  | ±  | +  |
| Mallon, 2002   | Adults (45-60 years)                                    | Community sample                                                                | HADS-D ≥ 8                                      | 1870    | 13.1         | 12                      | SWE     | +                     | +  | +  | +  | +  |
| Markkula, 2012 | Adults living in the community                          | Community sample                                                                | CIDI                                            | 6372    | 5.6          | 8 yrs                   | FINL    | +                     | +  | +  | +  | +  |
| Marzari, 2005  | Older adults (≥ 65 years)                               | Community sample                                                                | GDS-30 ≥ 10                                     | 5632    | NR           | 4                       | ITA     | ±                     | -  | +  | -  | +  |
| Mayne, 1996    | Male HIV patients                                       | Patients from study on men's health                                             | CES-D ≥ 16                                      | 402     | 57.2         | 3                       | US      | +                     | -  | +  | ±  | +  |
| McCusker, 2006 | Older medical inpatients (≥ 65 years)                   | Patients admitted to intensive care or cardiac units of 2 hospitals             | MDD or minD (DIS; DSM-IV)                       | 715     | 64.2         | 2.8                     | CAN     | +                     | +  | +  | ±  | +  |
| Mehta, 2003    | Older adults (≥ 70 years)                               | Community sample (AHEAD)                                                        | CES-D-8 ≥ 3                                     | 6301    | 25.2         | 2                       | US      | +                     | +  | +  | +  | +  |
| Mehta, 2013    | Patients with coronary heart disease                    | patients undergoing surgery                                                     | MARDS>6                                         | 1648    | 39.8         | 1 yr                    | INDIA   | -                     | -  | -  | ±  | -  |
| Melkas, 2010   | Acute ischemic stroke patients                          | Consecutive patients from hospital                                              | Depressive disorders (SCAN; DSM-III-R)          | 257     | 38.5         | 12                      | FINL    | +                     | +  | +  | ±  | +  |
| Meller, 1999   | Older adults (≥ 85 years)                               | Community sample                                                                | Depressive disorder (DSM-III-R)                 | 358     | NR           | 1                       | GERM    | +                     | +  | +  | ±  | +  |
| Miu, 2011      | Community dwelling older adults                         | new attendances of a geriatric day hospital of a regional hospital in Hong Kong | GDS-15 ≥ 8                                      | 209     | 22.5         | 1                       | CHI     | ±                     | +  | +  | -  | +  |
| Mogga, 2006    | Adults with MDD compared with non-depressed controls    | Community sample                                                                | MDD (DSM-IV; CIDI)                              | 600     | 50.0         | 3.7                     | ETH     | +                     | ±  | ±  | -  | -  |

|                                           | Patient group                                              | Recruitment                                                              | Definition of depression                                         | Total N | % de-pressed            | FU period <sup>a)</sup> | Country | Quality <sup>b)</sup> |    |    |    |    |
|-------------------------------------------|------------------------------------------------------------|--------------------------------------------------------------------------|------------------------------------------------------------------|---------|-------------------------|-------------------------|---------|-----------------------|----|----|----|----|
|                                           |                                                            |                                                                          |                                                                  |         |                         |                         |         | Q1                    | Q2 | Q3 | Q4 | Q5 |
| Mollica, 2001                             | Refugees from Bosnia                                       | Inhabitants of efügee camp in Croatia                                    | Indication of MDD based on HSCL (no formal diagnosis)            | 529     | 39.1                    | 3                       | BOSN    | ±                     | +  | +  | ±  | -  |
| Moraska, 2013                             | Heart failure patients                                     | in- and outpatients                                                      | PHQ9 $\geq$ 10                                                   | 402     | 11.0                    | 1.6 yrs                 | US      | +                     | +  | +  | ±  | +  |
| Morgenstern, 2011                         | Stroke patients                                            | patients presenting at medical center                                    | PHQ9                                                             | 669     | NR                      | 2 yrs                   | US      | +                     | -  | +  | +  | +  |
| Morris, 1993A Am J Psychiatry             | Stroke patients                                            | Consecutive patients                                                     | MDD or minD (PSE / DSM-III)                                      | 91      | 40.7                    | 10                      | US      | +                     | -  | +  | +  | -  |
| Morris, 1993B, Austr Nw Zeal J Psychiatry | Stroke patients                                            | Consecutive patients undergoing rehabilitation                           | MDD or minD (CID-I; DSM-III)                                     | 82      | MDD: 15.9<br>minD: 25.6 | 1,25                    | AUSTR   | +                     | -  | +  | -  | -  |
| Mroczek, 2007                             | Adult men                                                  | Community sample (Department of Veterans Affairs' Normative Aging Study) | SCL-90-D                                                         | 1663    | NR                      | 18                      | US      | -                     | -  | +  | ±  | +  |
| Murphy, 1988                              | Older depressed patients compared with community controls  | Patients referred to psychiatric services                                | Depressive disorder (PSE)                                        | 310     | 47.1                    | 4                       | UK      | ±                     | +  | +  | ±  | -  |
| Murphy, 2008                              | Adults                                                     | Community sample (Stirling county study)                                 | Depressive disorder according to interview (no formal diagnosis) | 1079    | 5.2 (n=56)              | 40                      | UK      | ±                     | +  | +  | ±  | +  |
| Murphy, 2013                              | Women with acute cardiac event                             | Hospital admissions                                                      | HADS-D $\geq$ 8                                                  | 136     | 19.9                    | 12 yrs                  | AUSTR   | +                     | ±  | +  | +  | -  |
| Mykletun, 2007                            | Adults ( $\geq$ 20 years)                                  | Community sample                                                         | HADS-D $\geq$ 8                                                  | 60280   | 4.8                     | 4.4                     | NORW    | ±                     | -  | +  | +  | +  |
| Nabi, 2010                                | Civil servants (35-55)                                     | Community sample                                                         | CESD $\geq$ 16                                                   | 5936    | 14.9                    | 5.6                     | UK      | +                     | ±  | +  | +  | +  |
| Nakaya, 2006                              | Lung cancer patients                                       | Patients with postoperative cancer                                       | MDD or minD (DSM-III-R; SCID)                                    | 229     | 5.7                     | 5,75                    | JAP     | +                     | -  | ±  | +  | +  |
| Nakaya, 2008                              | Lung cancer patients                                       | Patients enrolled in prospective study on lung cancer                    | HADS-D $\geq$ 8                                                  | 1178    | 22.2                    | 2.5                     | JAP     | +                     | +  | +  | +  | +  |
| Ng, 2007                                  | Patients with chronic obstructive pulmonary disease (COPD) | Consecutive hospital patients                                            | HADS-D $\geq$ 8                                                  | 376     | 44.4                    | 1                       | SING    | +                     | +  | ±  | +  | +  |
| Nightingale, 2001                         | Older hip fracture patients                                | Hospital patients                                                        | Depressive disorder (GMS-AGECAT)                                 | 731     | 12.7                    | 2                       | UK      | ±                     | +  | +  | ±  | +  |
| Novak, 2010                               | Patients after kidney transplantation                      | Kidney transplant outpatient clinic                                      | CES-D $\geq$ 18                                                  | 840     | 22.3                    | 5                       | HUNG    | +                     | -  | +  | ±  | +  |
| O'Connor, 1998                            | Nursing home residents                                     | Residents from 11 homes                                                  | BDI                                                              | 129     | 16.0                    | 4                       | CAN     | ±                     | +  | ±  | ±  | +  |
| O'Connor, 2008                            | Patients with heart failure                                | Patients admitted to cardiology service                                  | BDI $\geq$ 10                                                    | 1006    | 30.0                    | 2.7                     | US      | +                     | +  | +  | ±  | +  |



|                                | Patient group                                         | Recruitment                                                                                               | Definition of depression          | Total N | % depressed                                   | FU period <sup>a)</sup> | Country | Quality <sup>b)</sup> |    |    |    |    |
|--------------------------------|-------------------------------------------------------|-----------------------------------------------------------------------------------------------------------|-----------------------------------|---------|-----------------------------------------------|-------------------------|---------|-----------------------|----|----|----|----|
|                                |                                                       |                                                                                                           |                                   |         |                                               |                         |         | Q1                    | Q2 | Q3 | Q4 | Q5 |
| Okura, 2011                    | Older adults (≥ 71) with cognitive impairment         | Selected from community sample (ADAMS)                                                                    | NPI (cut-off not reported)        | 537     | 25.0                                          | 5                       | US      | +                     | -  | +  | ±  | +  |
| Onitilo, 2006                  | Adults (25 - 74 years)                                | Community sample (NHANES)                                                                                 | CES-D ≥ 16                        | 10025   | 25.3                                          | 8                       | US      | ±                     | +  | +  | +  | +  |
| Page-Shafer, 1996              | HIV infected homosexual or bisexual men               | recruited from census tracts with the highest incidence of AIDS (San Francisco Men's Health Study; SFMHS) | CES-D ≥ 16                        | 395     | 45.8                                          | 8.5                     | US      | +                     | ±  | +  | +  | +  |
| Pan, 2011                      | Nurses (35-50)                                        | Community survey (Nurses' Health Study)                                                                   | MHI-5 score ≤ 52                  | 78282   | 15.5                                          | 6                       | US      | +                     | +  | +  | +  | +  |
| Papaioannou, 2013              | Patients hospitalized for acute exacerbations of COPD | Hospital admissions                                                                                       | BDI ≥ 19                          | 230     | 39.0                                          | 1 yr                    | GREECE  | +                     | +  | ±  | +  | ±  |
| Parakh, 2008                   | Hospitalized myocardial infarction patients           | Patients with acute MI admitted to cardiology service at hospital                                         | MDD and dysthymia (SCID; DSM-IV)  | 208     | MDD: 10.3<br>Dysthymia: 3.2<br>BDI ≥ 10: 20.0 | 8                       | US      | +                     | +  | +  | +  | +  |
| Parashar, 2006                 | Myocardial infarction patients                        | Patients from 19 cardiac centers                                                                          | PHQ ≥ 10                          | 1873    | 20.6                                          | 0,5                     | US      | ±                     | -  | +  | +  | +  |
| Parmelee, 1992                 | Nursing home and congregate apartment residents       | Residents of one large facility                                                                           | Algorithm based on sads an gds-30 | 898     | Possible mdd: 12.9<br>Possible minD: 30.2     | 1,5                     | US      | ±                     | ±  | +  | ±  | +  |
| Patten, 2011                   | Adults (≥ 18 yrs)                                     | Community sample                                                                                          | MDD (CIDI-SF)                     | 14117   | 5.5                                           | 12 yrs                  | CAN     | +                     | ±  | +  | +  | +  |
| Pelle, 2010                    | Patients with chronic heart failure                   | Consecutive outpatients                                                                                   | SADI ≥ 3                          | 641     | 26.3                                          | 3.1                     | NL      | +                     | +  | +  | ±  | +  |
| Penninx, 1998                  | Older adults (≥ 70)                                   | Community sample (EPESE)                                                                                  | CESD                              | 3701    | 12.9                                          | 4                       | US      | +                     | ±  | +  | +  | +  |
| Penninx, 1999                  | Older adults (55-85 years)                            | Community sample (LASA)                                                                                   | MDD (DIS; DSM-III)<br>CES-D ≥ 16  | 3056    | MDD: 2.0<br>CES-D ≥ 16: 12.8                  | 4.2                     | NL      | +                     | -  | +  | +  | +  |
| Penninx, 2000 J Am Geriatr Soc | Moderately to severely disabled women                 | Community sample (Women's Health and Aging Study)                                                         | GDS-30 ≥ 10                       | 1002    | 31.6                                          | 3                       | US      | ±                     | +  | +  | ±  | +  |
| Philips, 2008                  | Female nonmetastatic breast cancer                    | Population based study                                                                                    | HADS-D                            | 708     | 2.8                                           | 8.2                     | AUSTR   | ±                     | +  | +  | +  | +  |
| Phillips, 2009                 | Vietnam veterans                                      | Random selection of Vietnam veterans (Vietnam Experience Study)                                           | MDD (DIS; DSM-IV)                 | 4256    | 6.5                                           | 15                      | US      | +                     | +  | +  | +  | +  |

|                     | Patient group                                                                                  | Recruitment                                                         | Definition of depression                                              | Total N | % depressed                | FU period <sup>a)</sup> | Country | Quality <sup>b)</sup> |       |       |       |    |
|---------------------|------------------------------------------------------------------------------------------------|---------------------------------------------------------------------|-----------------------------------------------------------------------|---------|----------------------------|-------------------------|---------|-----------------------|-------|-------|-------|----|
|                     |                                                                                                |                                                                     |                                                                       |         |                            |                         |         | Q1                    | Q2    | Q3    | Q4    | Q5 |
| Pieper, 2011        | Primary care patients                                                                          | Selection from 3188 GPs                                             | DSQ $\geq$ 8                                                          | 5420    | 12.2                       | 4.5                     | GERM    | +                     | -     | $\pm$ | +     | +  |
| Pina-Escudero, 2011 | Older adults                                                                                   | Community sample                                                    | m-CESD                                                                | 2615    | 43.1                       | 2 yrs                   | MEX     | $\pm$                 | -     | +     | +     | +  |
| Pirl, 2008          | Advanced non-small cell lung cancer patients.                                                  | Patients in ambulatory thoracic oncology clinic (EIPC study)        | HADS-D $\geq$ 8                                                       | 43      | 23.3                       | 0,5                     | US      | $\pm$                 | +     | $\pm$ | $\pm$ | +  |
| Pitkala, 2003       | Older adults (75, 80 and 85 years)                                                             | Community sample                                                    | SDS $\geq$ 45                                                         | 411     | SD3,5S $\geq$ 45: 23.8     | 10                      | FINL    | $\pm$                 | -     | +     | -     | -  |
| Pitsavos, 2007      | Heart disease patients                                                                         | Consecutive patients entering cardiology clinics or emergency units | CES-D $\geq$ 20                                                       | 2172    | 33.3                       | 0.1                     | GRE     | +                     | -     | -     | +     | -  |
| Pollak, 1990        | Older adults (65-98 years)                                                                     | Community sample                                                    | CES-D $\geq$ 16                                                       | 1855    | NR                         | 3.5                     | US      | -                     | +     | $\pm$ | $\pm$ | +  |
| Prieto, 2005        | Hematological cancer patients who survived longer than 90 days after stem-cell transplantation | Patients recruited through hospital                                 | MDD and minD (clinical interview; modified DSM-IV)                    | 199     | MDD: 8.5<br>minD: 9.0      | 5                       | SPAIN   | +                     | +     | $\pm$ | +     | +  |
| Prince, 1998        | Older adults ( $\geq$ 65 years)                                                                | Community sample                                                    | Depression according to SHORTCARE instrument                          | 507     | 17.7                       | 1                       | UK      | +                     | $\pm$ | +     | -     | -  |
| Pulska, 1997        | People born in 1923                                                                            | Community sample (Ahtari study)                                     | MDD (diagnostic interview)                                            | 1272    | MDD: 2.2                   | 6                       | FINL    | +                     | +     | +     | +     | +  |
| Rapp, 2008          | Older adults ( $\geq$ 70 years)                                                                | Community sample (Berlin Aging Study)                               | Depressive disorder (DSM-III-R; GMS-A)                                | 497     | 25.8                       | 15                      | GERM    | +                     | $\pm$ | +     | $\pm$ | +  |
| Richardson, 1990 A  | Patients with hematologic malignancies                                                         | Newly diagnosed patients                                            | SDS $\geq$ 59                                                         | 90      | 14.4                       | 0,5                     | US      | $\pm$                 | +     | $\pm$ | $\pm$ | +  |
| Richardson, 1990 B  | Patients with rectal cancer                                                                    | Newly diagnosed patients                                            | SDS $\geq$ 59                                                         | 47      | 12.8                       | 0,5                     | US      | $\pm$                 | +     | $\pm$ | $\pm$ | +  |
| Riezebos, 2010      | Patients with end-stage renal disease                                                          | Hospital patients                                                   | HADS-D $\geq$ 7                                                       | 101     | 41.6                       | 1                       | NL      | +                     | +     | +     | $\pm$ | +  |
| Rollman, 2012       | Hospitalized Heart Failure Patients                                                            | Patients in hospital                                                | PHQ2 $\geq$ 1                                                         | 471     | 78.8                       | 1 yr                    | US      | $\pm$                 | +     | +     | $\pm$ | -  |
| Romanelli, 2002     | Older patients ( $\geq$ 65 years) with myocardial infarction                                   | Patients hospitalized with acute MI                                 | BDI $\geq$ 10 or MDD / dysth (SCID; DSM-III-R)                        | 153     | 22.9                       | 0,33                    | US      | $\pm$                 | $\pm$ | $\pm$ | -     | -  |
| Rovner, 1991        | Nursing home residents                                                                         | Consecutive admissions                                              | Depressive disorder (M-PSE; DSM-III-R)<br>Depressive symptoms (M-PSE) | 454     | DD: 12.6<br>Symptoms: 18.1 | 1                       | US      | +                     | +     | $\pm$ | $\pm$ | +  |
| Rozzini, 2012       | Older adults (>70 yrs)                                                                         | Community sample                                                    | sGDS>3                                                                | 549     | 44.0                       | 5 yrs                   | ITALY   | $\pm$                 | +     | $\pm$ | $\pm$ | +  |

|                    | Patient group                                                | Recruitment                                                                         | Definition of depression                         | Total N | % de-pressed            | FU period <sup>a)</sup> | Country | Quality <sup>b)</sup> |    |    |    |    |
|--------------------|--------------------------------------------------------------|-------------------------------------------------------------------------------------|--------------------------------------------------|---------|-------------------------|-------------------------|---------|-----------------------|----|----|----|----|
|                    |                                                              |                                                                                     |                                                  |         |                         |                         |         | Q1                    | Q2 | Q3 | Q4 | Q5 |
| Rutledge, 2003     | Older women ( $\geq 65$ years)                               | Community sample                                                                    | GDS-15 $\geq 6$                                  | 7524    | NR                      | 6                       | US      | ±                     | +  | +  | +  | +  |
| Rutledge, 2006     | Women referred for a coronary angiogram                      |                                                                                     | BDI $\geq 17$                                    | 505     | 18.2                    | 2.3                     | US      | ±                     | -  | +  | +  | +  |
| Ryan, 2008         | Older adults ( $\geq 65$ years)                              | Community sample (3C study)                                                         | MDD (Mini; DSM-IV) or CES-D $\geq 23$            | 7363    | 10.2                    | 4                       | FRANCE  | +                     | ±  | ±  | +  | +  |
| Ryan, 2012         | Older adults (>65 yrs)                                       | Community sample from 3 cities                                                      | CES-D $\geq 16$                                  | 5135    | 29.1                    | 6 yrs                   | FRANCE  | +                     | +  | +  | +  | +  |
| Saito-Nakaya, 2006 | Patients with resectable non-small-cell lung cancer          | Consecutive newly diagnosed patients                                                | Depressive disorder (SCID; DSM-IV)               | 238     | 6.3                     | 5.9                     | JAP     | +                     | +  | +  | +  | +  |
| Saito-Nakaya, 2008 | Patients with non-small cell lung cancer                     | Consecutive newly diagnosed lung cancer Patients (the Lung Cancer Database Project) | HADS-D $\geq 4$                                  | 1230    | 45.1                    | 2                       | JAP     | +                     | -  | +  | +  | +  |
| Santos, 2012       | end-stage renal disease patients undergoing hemodialysis     | Patient of a renal unit                                                             | CESD10 $\geq 10$                                 | 161     | 8.0                     | 1 yr                    | BRAS    | +                     | +  | +  | ±  | -  |
| Saz, 1999          | Older adults ( $\geq 65$ years)                              | Community sample                                                                    | Psychotic and neurotic depression (AGECAT)       | 1080    | 10.6                    | 4,5                     | SPAIN   | ±                     | ±  | ±  | -  | -  |
| Schiffer, 2009     | Chronic heart failure patients                               | CHF outpatients                                                                     | BDI $\geq 10$                                    | 366     | 36.0                    | 1                       | NL      | +                     | +  | +  | +  | +  |
| Schleifer, 1989    | Patients with myocardial infarction                          | Consecutive patients with MI hospitalized in one hospital                           | MDD and minD (RDC criteria)                      | 283     | MDD: 18.4<br>minD: 26.9 | 0,25                    | US      | +                     | +  | +  | -  | -  |
| Schoevers, 2000    | Older adults ( $\geq 65$ years)                              | Community sample                                                                    | Neurotic and psychotic depression (GMS / AGECAT) | 4501    | 12.9                    | 6                       | NL      | +                     | ±  | +  | ±  | +  |
| Schuckit, 1980     | Older medical patients                                       | Patients admitted to hospital                                                       | Depressive disorder (Feighner criteria)          | 280     | 7.3                     | 3                       | US      | +                     | +  | +  | -  | -  |
| Schulz, 2000       | Older adults ( $\geq 65$ years)                              | Community sample from 4 communities (Cardiovascular Health Study)                   | CES-D-10 $\geq 8$                                | 5201    | 20.0                    | 6                       | US      | +                     | +  | +  | +  | +  |
| Sehlen, 2012       | cancer patients undergoing radiotherapy                      | Hospital patients                                                                   | SDS                                              | 938     | 43.1                    | 5 yrs                   | GERM    | +                     | ±  | +  | ±  | +  |
| Shamash, 1992      | Patients ( $\geq 60$ years) undergoing emergency hip surgery | Consecutive patients in a hospital                                                  | BAS-DEP $\geq 13$                                | 45      | 26.7                    | 1                       | UK      | ±                     | +  | ±  | ±  | -  |
| Sharifi, 2012      | Nursing home residents                                       | through nursing home                                                                | GDS15 $\geq 12$                                  | 247     | NR                      | 3.3 yrs                 | IRAN    | +                     | +  | +  | +  | +  |

|                  | Patient group                                                          | Recruitment                                                               | Definition of depression                                                                                                               | Total N | % de-pressed             | FU period <sup>a)</sup> | Country | Quality <sup>b)</sup> |    |    |    |    |
|------------------|------------------------------------------------------------------------|---------------------------------------------------------------------------|----------------------------------------------------------------------------------------------------------------------------------------|---------|--------------------------|-------------------------|---------|-----------------------|----|----|----|----|
|                  |                                                                        |                                                                           |                                                                                                                                        |         |                          |                         |         | Q1                    | Q2 | Q3 | Q4 | Q5 |
| Sharma, 1998     | Depressed patients compared with subthreshold and non-depressed people | Selection from community sample                                           | Depressive disorder (GMS / AGE CAT)                                                                                                    | 245     | DD: 54.2<br>Subthr: 21.3 | 5                       | UK      | -                     | ±  | ±  | -  | -  |
| Shekelle, 1981   | Men (40 to 55 years)                                                   | Employees of a company (WEHS study)                                       | MMPI-D based on total MMPI                                                                                                             | 2020    | 18.8                     | 17                      | US      | +                     | -  | +  | +  | -  |
| Singh, 1997 A    | Patients with cirrhosis                                                | Patients with end-stage liver disease evaluated for liver transplantation | BDI $\geq$ 10                                                                                                                          | 81      | 64.2                     | 0,5                     | US      | +                     | +  | ±  | -  | +  |
| Snowdon, 1995    | Older adults ( $\geq$ 65 years)                                        | Community sample                                                          | BAS $\geq$ 8 + BDI $\geq$ 13 + HAM-D $\geq$ 13<br>Or: BAS = 7 + BDI $\geq$ 13 and HAM-D $\geq$ 15<br>And depressive disorder (DSM-III) | 146     | 13.0                     | 8                       | AUSTR   | ±                     | ±  | ±  | -  | -  |
| St John, 2012    | Older adults ( $\geq$ 65 yrs)                                          | Community sample from 3 cities                                            | CES-D $\geq$ 16                                                                                                                        | 1751    | 13.8                     | 5 yrs                   | CAN     | +                     | +  | +  | ±  | +  |
| Stage, 2005      | COPD patients                                                          | Outpatients                                                               | DD according to psychiatric interview (ICD-10)                                                                                         | 49      | 46.9                     | 2.2                     | DENM    | ±                     | +  | +  | +  | +  |
| Stamatakis, 2004 | Adult men (42, 48, 54 and years old)                                   | (Kuopio Ischemic Heart Disease Risk Factor Study)                         | Human Population Laboratory Depress scale $\geq$ 4                                                                                     | 2682    | 18.2                     | 10                      | FINL    | +                     | -  | +  | +  | +  |
| Steel, 2007      | Patients with hepatobiliary carcinoma                                  | Consecutive patients admitted to hospital                                 | CES-D $\geq$ 16                                                                                                                        | 101     | 35.9                     | NR                      | US      | +                     | +  | +  | +  | +  |
| Stek, 2005       | Older adults (85 years)                                                | Community sample (Leiden 85 plus study)                                   | GDS-15 $\geq$ 4                                                                                                                        | 476     | 22.9                     | 5                       | NL      | +                     | +  | +  | +  | +  |
| Step toe, 2011   | Older adults                                                           | Community sample from 3 cities                                            | CES-D $\geq$ 3                                                                                                                         | 3853    | 10.8                     | 5.1 yrs                 | UK      | +                     | -  | +  | +  | +  |
| Stern, 2001      | Older adults (64-79 years)                                             | Community sample (San Antonio Longitudinal Study of Aging; SALSA)         | GDS-30 $\geq$ 11                                                                                                                       | 795     | 17.5                     | 5,2                     | US      | +                     | +  | +  | +  | +  |
| Stommel, 2002    | Patients with breast, colon, lung, and prostate carcinoma              | Recruited from hospitals                                                  | CES-D $\geq$ 16                                                                                                                        | 871     | 32.4                     | 1.6                     | US      | +                     | +  | +  | ±  | +  |
| Sudore, 2012     | Adults with Type 2 Diabetes                                            | HMO members                                                               | PHQ2                                                                                                                                   | 13171   | 24.1                     | 2 yrs                   | US      | +                     | +  | +  | ±  | -  |
| Sullivan, 2003   | Patients with stable coronary disease                                  | HMO patients                                                              | MDD (DIS / HAM-D)                                                                                                                      | 199     | MDD: 12.6<br>minD: 18.7  | 5                       | US      | +                     | -  | +  | ±  | +  |

|                     | Patient group                                                | Recruitment                                                   | Definition of depression                                              | Total N | % de-pressed                   | FU period <sup>a)</sup> | Country | Quality <sup>b)</sup> |       |       |       |    |
|---------------------|--------------------------------------------------------------|---------------------------------------------------------------|-----------------------------------------------------------------------|---------|--------------------------------|-------------------------|---------|-----------------------|-------|-------|-------|----|
|                     |                                                              |                                                               |                                                                       |         |                                |                         |         | Q1                    | Q2    | Q3    | Q4    | Q5 |
| Sullivan, 2004      | Patients with advanced heart failure                         | Outpatients recruited through HMO                             | MDD (PRIME-MD interview)                                              | 142     | 28.3                           | 3                       | US      | +                     | +     | +     | +     | +  |
| Sutcliffe, 2007     | Residents of care homes                                      | Newly admitted residents                                      | GDS-12R $\geq$ 5                                                      | 308     | 43.2                           | 0.4                     | UK      | +                     | $\pm$ | -     | -     | +  |
| Suthahar, 2008      | Cancer patients                                              | Newly diagnosed treatment naïve cancer patients in 1 hospital | HADS-D > 7                                                            | 80      | NR                             | 2.17                    | MAL     | +                     | +     | $\pm$ | $\pm$ | +  |
| Suzuki, 2011        | Hospitalized patients with cardiovascular disease.           | Cardiology department of a hospital in Tokyo                  | Zung SDS                                                              | 505     | 21.6                           | 3.2                     | JAP     | $\pm$                 | +     | $\pm$ | +     | +  |
| Takeida, 1997       | Older adults (60-74 years)                                   | Community sample                                              | SDS $\geq$ 2,4                                                        | 2166    | 11.5                           | 4                       | JAP     | $\pm$                 | -     | +     | +     | -  |
| Takeshita, 2002     | Japanese American men in Hawaii (73-93 years)                | (Honolulu Heart Program)                                      | CES-D-11                                                              | 3196    | 9.9                            | 6                       | US      | +                     | +     | +     | +     | +  |
| Teng, 2013 A        | Older adults (> 60 yrs)                                      | Community sample from 3 cities                                | CESD10 $\geq$ 10                                                      | 1784    | 32.5                           | 4 yrs                   | TAI-WAN | +                     | $\pm$ | +     | +     | +  |
| Testa, 2011         | elderly with chronic heart failure                           | Community sample from 3 cities                                | GDS-30 $\geq$ 21                                                      | 1268    | 12.3                           | 12 yrs                  | ITALY   | $\pm$                 | $\pm$ | $\pm$ | $\pm$ | +  |
| Teunissen, 2006     | Hospitalised advanced cancer patients                        | Hospitalised patients referred to a palliative care team      | Depression according to semi-structured interview with nurse          | 181     | 27.1                           | 2.2                     | NL      | -                     | +     | $\pm$ | $\pm$ | +  |
| Thombs, 2008        | Patients hospitalized for acute coronary syndrome            | Patients from 12 coronary care units                          | BDI $\geq$ 10                                                         | 800     | 5.6                            | 1                       | CAN     | $\pm$                 | +     | +     | +     | -  |
| Tian, 2009          | Patients with esophageal, stomach, or colorectal cancers     | Patients from 4 hospitals                                     | Zung SDS > 40                                                         | 113     | 63.7                           | 1                       | CHI     | +                     | +     | $\pm$ | $\pm$ | -  |
| Tilvis, 1998        | Older adults (65, 75, 80, 85 years)                          | Community sample                                              | Depressive disorder (interview according to DSM-III)<br>SDS $\geq$ 40 | 1330    | DD: 2.5<br>SDS $\geq$ 40: 31.6 | 5                       | FINL    | -                     | -     | -     | $\pm$ | +  |
| Tully, 2008         | Coronary artery bypass graft patients                        | Patients undergoing a first-time CABG                         | DASS-D $\geq$ 10                                                      | 440     | 20.2                           | 5.8                     | AUSTR   | $\pm$                 | +     | +     | $\pm$ | +  |
| Tzeis, 2011         | Implantable cardioverter defibrillator recipients            | Patients of the German Heart Center outpatient clinic         | HADS-D $\geq$ 8                                                       | 236     | 21.2                           | 6.1                     | GERM    | +                     | +     | +     | $\pm$ | +  |
| Vaccarino, 2001     | Patients ( $\geq$ 50 years) with decompensated heart failure | Consecutive patients to hospital                              | GDS-15 $\geq$ 11                                                      | 391     | 9.0 (n=35)                     | 0,5                     | US      | +                     | +     | +     | +     | -  |
| van den Brink, 2005 | Older men born between 1900 and 1920                         | Community sample                                              | SDS                                                                   | 1141    | Highest tertile                | 10                      | EU (3)  | $\pm$                 | +     | +     | $\pm$ | +  |
| Van den Broek, 2011 | Older adults ( $\geq$ 65)                                    | Community study (CHS study)                                   | CES-D-10 $\geq$ 8                                                     | 4114    | 20.4                           | 14                      | US      | +                     | +     | +     | +     | +  |
| Van Dijk, 2012      | patients with end-stage renal disease                        | Incident patients in 38 health centers                        | MHIKDSQLSF>52                                                         | 1528    | 22.7                           | 5 yrs                   | NL      | $\pm$                 | +     | +     | $\pm$ | +  |

|                                    | Patient group                                                                   | Recruitment                                                                | Definition of depression                              | Total N | % de-pressed | FU period <sup>a)</sup> | Country | Quality <sup>b)</sup> |    |    |    |    |
|------------------------------------|---------------------------------------------------------------------------------|----------------------------------------------------------------------------|-------------------------------------------------------|---------|--------------|-------------------------|---------|-----------------------|----|----|----|----|
|                                    |                                                                                 |                                                                            |                                                       |         |              |                         |         | Q1                    | Q2 | Q3 | Q4 | Q5 |
| van Jaarsveld, 2006                | Patients with incident congestive heart failure and acute myocardial infarction | Recruited from population sample                                           | HADS-D $\geq$ 8                                       | 472     | 26.3         | 7                       | NL      | +                     | +  | ±  | +  | +  |
| Vogt, 1994                         | Adults                                                                          | Community sample (member of a large HMO)                                   | High depression score based on questions from DSM-III | 2573    | 37.3         | 15                      | US      | +                     | +  | ±  | +  | +  |
| Volz, 2011                         | Patients with chronic heart failure                                             | Patients of a standard outpatient cardiac rehabilitation program           | HADS-D $\geq$ 10                                      | 111     | 26.1         | 2.8                     | SWIT    | +                     | +  | ±  | +  | +  |
| von Ammon<br>Cavanaugh, 2001       | Medical inpatients                                                              | Consecutive admissions to 1 hospital                                       | MDD (SADS/ DSM-IV)                                    | 151     | 16.6         | NR                      | BRAS    | ±                     | +  | ±  | ±  | -  |
| Wassertheil-<br>Smoller, 2004      | Postmenopausal women (50-79 years)                                              | Recruited at 40 clinical centers (WHI-OS study)                            | CES-D-6 $\geq$ 5                                      | 91676   | 22.0         | 4.1                     | US      | ±                     | -  | +  | -  | +  |
| Watkins, 2013                      | Patients with With Coronary Heart Disease                                       | in/outpatient visit for diagnostic cardiac catheterization in one hospital | HADSD $\geq$ 8                                        | 934     | 17.6         | 3 yrs                   | US      | ±                     | +  | ±  | ±  | +  |
| Watson, 2005 (and<br>Watson, 1999) | Early stage breast cancer patients (women)                                      | Hospital patients                                                          | HADS-D $\geq$ 11                                      | 578     | 1.7          | 10                      | UK      | ±                     | +  | ±  | -  | +  |
| Welin, 2000                        | Patients (below 65 years) with a first myocardial infarction                    | Patients from a myocardial infarction register + outpatient clinic         | SDS $\geq$ 40                                         | 275     | 36.7         | 10                      | SWE     | +                     | +  | ±  | +  | +  |
| Whang, 2010                        | patients with unstable angina                                                   | patients admitted to 3 university hospitals                                | BDI $\geq$ 10                                         | 209     | 49.8         | 3.5                     | US      | +                     | +  | ±  | ±  | +  |
| Wheeler, 2012                      | Patients with acute myocardial infarction                                       | Patients admitted to hospitals                                             | CESD $\geq$ 27                                        | 336     | 39.3         | 5 yrs                   | AUSTR   | -                     | +  | ±  | ±  | +  |
| Whooley, 1998                      | Women ( $\geq$ 67 years)                                                        | Community sample                                                           | GDS-15 $\geq$ 6                                       | 7518    | 6.3          | 7                       | US      | +                     | +  | +  | +  | +  |
| Whooley, 2008                      | Patients with Coronary Heart Disease                                            | (Heart and Soul study)                                                     | PHQ-9 $\geq$ 10                                       | 1017    | 19.6         | 4.8                     | US      | +                     | +  | ±  | +  | +  |
| Williams, 2006                     | Patients with dementia with Lewy bodies or Alzheimer disease                    | Community recruitment                                                      | Psychiatric interview                                 | 315     | NR           | NR                      | US      | ±                     | +  | -  | ±  | +  |
| Wilson, 2007B                      | Older adults ( $\geq$ 75 years) discharged from hospital                        | Consecutive patients from 2 hospitals                                      | Depressive disorder (GMS/AGECAT)                      | 158     | 34.1         | 2                       | UK      | ±                     | -  | ±  | -  | +  |
| Winkley, 2007                      | Patients with their first diabetic foot ulcer                                   | Community chiropody and hospital foot clinics                              | MDD, minD (SCAN; DSM-IV)                              | 253     | 32.4         | 1,5                     | UK      | ±                     | +  | +  | +  | +  |

|                  | Patient group                                         | Recruitment                                                              | Definition of depression                      | Total N | % de-pressed | FU period <sup>a)</sup> | Country | Quality <sup>b)</sup> |    |    |    |    |
|------------------|-------------------------------------------------------|--------------------------------------------------------------------------|-----------------------------------------------|---------|--------------|-------------------------|---------|-----------------------|----|----|----|----|
|                  |                                                       |                                                                          |                                               |         |              |                         |         | Q1                    | Q2 | Q3 | Q4 | Q5 |
| Winkley, 2012    | Patients with first diabetic foot ulcer               | Patients presenting at all hospital foot and community chiropody clinics | MDD (SCAN)                                    | 253     | 32.2         | 5 yrs                   | UK      | ±                     | +  | ±  | ±  | +  |
| Wu, 2010         | Patients with heart failure                           | Patients from outpatient cardiology clinics                              | PHQ-9 > 10                                    | 136     | 30.1         | 1.08                    | US      | ±                     | +  | ±  | ±  | +  |
| Wulsin, 2005     | Adults (30-91 years)                                  | Community sample (Framingham Heart Study)                                | CES-D ≥ 16                                    | 3634    | 14.1         | 5.9                     | US      | ±                     | +  | ±  | +  | +  |
| Wyman, 2012      | Adults (> 18 yrs)                                     | Community sample                                                         | CES-D ≥ 16                                    | 2746    | 20.5         | 40 yrs                  | US      | ±                     | -  | ±  | ±  | +  |
| Yaffe, 2003      | Frail elderly living in the community                 | Patients eligible for nursing home placement                             | GDS-15 ≥ 6                                    | 250     | 29.2         | 1,5                     | US      | +                     | -  | ±  | ±  | +  |
| Yasuda, 2002     | Older adults (65 – 84 years)                          | Community sample                                                         | GHQ-30 depression subscale ≥ 1 standard score | 908     | NR           | 7,5                     | JAP     | ±                     | ±  | +  | +  | +  |
| Ye, 2013         | Patients with With Coronary Heart Disease             | Community sample                                                         | CESD4 ≥ 4                                     | 4676    | 13.6         | 3.8 yrs                 | US      | ±                     | +  | +  | ±  | +  |
| Yohannes, 2005   | COPD patients                                         | Patients discharged from hospital after acute exacerbation of COPD       | BASDEC ≥ 7                                    | 100     | 56.0         | 1                       | UK      | +                     | +  | ±  | +  | +  |
| Young, 2010      | Patients with Stage 5 diabetic chronic kidney disease | Cohort study among primary care diabetic patients (Pathway Study)        | PHQ-9 ≥ 10                                    | 110     | 22.1         | 5                       | US      | +                     | +  | +  | +  | +  |
| Yu, 2012         | Patients with Gastric Cancer                          | Through hospital                                                         | Zung SDS > 0.7                                | 300     | 31.0         | 1.1 yrs                 | CHI     | ±                     | +  | +  | ±  | +  |
| Zahn, 2010       | patients newly listed for heart transplantation       | Consecutive patients in seventeen German-speaking hospitals              | HADSD ≥ 8                                     | 318     | 38.7         | 1                       | GERM    | +                     | +  | ±  | +  | +  |
| Zelle, 2012      | Renal transplantation patients                        | hospital patients                                                        | SCL90 ≥ 25                                    | 527     | 31.0         | 7 yrs                   | NL      | ±                     | +  | ±  | +  | +  |
| Zimmermann, 2006 | Renal replacement therapy patients                    | Patients from one hospital                                               | BDI ≥ 15                                      | 125     | 53.4         | 6.5                     | BRAS    | ±                     | ±  | ±  | ±  | -  |
| Zuidersma, 2012  | Patients with myocardial infarction                   | Consecutive patients from 4 hospitals                                    | MDD (CIDI)                                    | 2493    | 15.9         | 6,3 yrs                 | NL      | ±                     | +  | +  | +  | +  |
| Zuluaga, 2010    | patients with heart failure-related emergencies       | Hospitalized patients from 4 hospitals                                   | GDS-10 ≥ 5                                    | 433     | 23.8         | 5.7                     | SPAIN   | ±                     | +  | +  | +  | +  |

<sup>a)</sup> FU: Follow-up period.

<sup>b)</sup> The quality was scored on the following domains: Q1. Study participation; Q2. Study attrition; Q3. Outcome measurement; Q4. Confounding measurement and account; Q5. Analysis.

## Appendix E. References of studies included in the meta-analysis

1. Abbatecola AM, Spazzafumo L, Corsonello A, Sirolla C, Bustacchini S, Guffanti E. Development and validation of the HOPE prognostic index on 24-month posthospital mortality and rehospitalization: Italian National Research Center on Aging (INRCA). *Rejuven Res* 2011; 14: 605-13.
2. Adams J, Kuchibhatla M, Christopher EJ, Alexander JD, Clary GL, Cuffe MS, Califf RM, Krishnan RR, O'Connor CM, Jiang W. Association of Depression and Survival in Patients with Chronic Heart Failure over 12 Years. *Psychosom* 2012; 53: 339-46.
3. Ahto M, Isoaho R, Puolijoki H, Vahlberg T, Kivelä S. Stronger symptoms of depression predict high coronary heart disease mortality in older men and women. *Int J Geriatr Psychiatry* 2007; 22: 757-63.
4. Akechi T, Okamura H, Okuyama T, Furukawa TA, Nishiwaki Y, Uchitomi Y. Psychosocial factors and survival after diagnosis of inoperable non-small cell lung cancer. *Psychooncol* 2009; 18: 23-9.
5. Almagro P, Calbo E, Ochoa de Echagüen A, Barreiro B, Quintana S, Heredia JL, Garau J. Mortality after hospitalization for COPD. *Chest* 2002; 121: 1441-8.
6. Almeida OP, Alfonso H, Hankey GJ, Flicker L. Depression, antidepressant use and mortality in later life: the Health In Men Study. *PLoS One* 2010; 5: e11266.
7. Amador LF, Al Snih S, Markides KS, Goodwin JS. Weight change and mortality among older Mexican Americans. *Aging Clin Exp Res* 2006; 18: 196-204.
8. Ang DC, Choi H, Kroenke K, Wolfe F. Comorbid depression is an independent risk factor for mortality in patients with rheumatoid arthritis. *J Rheumatol* 2005; 32: 1013-9.
9. Anstey KJ, Luszcz MA. Mortality risk varies according to gender and change in depressive status in very old adults. *Psychosom Med* 2002; 64: 880-8.
10. Arfken CL, Lichtenberg PA, Tancer ME. Cognitive impairment and depression predict mortality in medically ill older adults. *J Gerontol A Biol Sci Med Sci* 1999; 54: M152-6.
11. Ariaratnam S, Devi A, Kaur G, Sinniah D, Suleiman A, Thambu M, Ismail F. Psychiatric morbidity and survival in newly diagnosed treatment-naive cancer patients - A Study from Malaysia. *Biomed Res* 2008; 19: 113-6.
12. Aromaa A, Raitasalo R, Reunanen A, Impivaara O, Heliovaara M, Knekt P, Lehtinen V, Joukamaa M, Maatela J. Depression and cardiovascular diseases. *Acta Psychiatr Scand* 1994; Suppl 377: 77-82.
13. Arrieta O, Angulo LP, Núñez-Valencia C, Dorantes-Gallareta Y, Macedo EO, Martínez-López D, Alvarado S, Corona-Cruz JF, Oñate-Ocaña LF. Association of Depression and Anxiety on Quality of Life, Treatment Adherence, and Prognosis in Patients with Advanced Non-small Cell Lung Cancer. *Ann Surg Oncol* 2013; 20: 1941-8.
14. Arve S, Lehtonen A, Tilvis RS. Prognosis of depression with and without dementia in old age. *Arch Gerontol Geriatr* 1998; 27: 141-6.
15. Atlantis E, Grayson DA, Browning C, Sims J, Kendig H. Cardiovascular disease and death associated with depression and antidepressants in the Melbourne longitudinal studies on healthy ageing (MELSHA). *Int J Geriatr Psychiatry* 2011; 26: 341-50.
16. Baker RA, Andrew MJ, Schrader G, Knight JL. Preoperative depression and mortality in coronary artery bypass surgery: preliminary findings. *ANZ J Surg* 2001; 71: 139-142.



17. Baldwin RC, Gallagley A, Gourlay M, Jackson A, Burns A. Prognosis of late life depression: a three-year cohort study of outcome and potential predictors. *Int J Geriatr Psychiatry* 2006; 21: 57-63.
18. Balogun RA, Abdel-Rahman EM, Balogun SA, Lott EH, Lu JL, Malakauskas SM, Ma JZ, Kalantar-Zadeh K, Kovesdy CP. Association of depression and antidepressant use with mortality in a large cohort of patients with nondialysis-dependent CKD. *Clin J Am Soc Nephrol* 2012; 7: 1793-800.
19. Barefoot JC, Helms MJ, Mark DB, Blumenthal JA, Califf RM, Haney TL, O'Connor CM, Siegler IC, Williams RB. Depression and long term mortality risk in patients with coronary artery disease. *Am J Cardiol* 1996; 78: 613-17.
20. Barry LC, Allore HG, Guo Z, Bruce ML, Gill TM. Higher burden of depression among older women: the effect of onset, persistence, and mortality over time. *Arch Gen Psychiatry* 2008; 65: 172-8.
21. Batterham PJ, Christensen H, MacKinnon AJ. Mental health symptoms associated with morbidity, not mortality, in an elderly community sample. *Soc Psychiatry Psychiatr Epidemiol* 2012; 47: 79-85.
22. Ben-Arie O, Welman M, Teggim AF. The depressed elderly living in the community: A follow-up study. *Br J Psychiatry* 1990; 157: 425-27.
23. Ben-Ezra M, Shmotkin D. Predictors of mortality in the old-old in Israel: the Cross-sectional and Longitudinal Aging Study. *J Am Geriatr Soc* 2006; 54: 906-11.
24. Billig N, Ahmed SW, Kenmore PI. Approaches to senior care #1. Hip fracture, depression, and cognitive impairment: a follow-up study. *Orthop Rev* 1988; 17: 315-20.
25. Black SA, Markides KS. Depressive symptoms and mortality in older Mexican Americans. *Ann Epidemiol* 1999; 9: 45-52.
26. Blazer DG. Social support and mortality in an elderly community population. *Am J Epidemiol* 1982; 115: 684-94.
27. Blumenthal JA, Lett HS, Babyak MA, White W, Smith PK, Mark DB, Jones R, Mathew JP, Newman MF, NORG Investigators. Depression as a risk factor for mortality after coronary artery bypass surgery. *Lancet* 2003; 362: 604-09.
28. Borowicz L, Royall R, Grega M, Selnes O, Lyketsos C, McKhann G. Depression and cardiac morbidity 5 years after coronary artery bypass surgery. *Psychosomatics* 2002; 43: 464-71.
29. Boscarino JA. Psychobiologic predictors of disease mortality after psychological trauma: implications for research and clinical surveillance. *J Nerv Ment Dis* 2008; 196: 100-7.
30. Bosworth HB, Siegler IC, Brummett, BH, Barefoot JC, Williams RB, Clapp-Channing NE, Mark DB. The association between self-rated health and mortality in a well-characterized sample of coronary artery disease patients. *Med Care* 1999; 37: 1226-36.
31. Bot M, Pouwer F, Zuidersma M, van Melle JP, de Jonhe P. Association of coexisting diabetes and depression with mortality after myocardial infarction. *Diabetes Care* 2012; 35: 503-9.
32. Boulware LE, Liu Y, Fink NE, Coresh J, Ford DE, Klag MJ, Powe NR. Temporal relation among depression symptoms, cardiovascular disease events, and mortality in end-stage renal disease: contribution of reverse causality. *Clin J Am Soc Nephrol* 2006; 1: 496-504.
33. Brill PA, Kohl HW, Blair SN. Anxiety, depression, physical fitness, and all-cause mortality in men. *J Psychosom Res* 1992; 36: 267-73.

34. Bruce DG, Davis WA, Starkstein SE, Davis TME. A prospective study of depression and mortality in patients with type 2 diabetes: the Fremantle Diabetes Study. *Diabetologia* 2005; 48: 2532-9.
35. Bruce ML, Leaf PJ, Rozal GPM, Florio L, Hoff RA, Phil M. Psychiatric status and 9-year mortality data in the New Haven Epidemiologic Catchment Area Study. *Am J Psychiatry* 1994; 151: 716-21.
36. Buccheri G. Depressive reactions to lung cancer are common and often followed by a poor outcome. *Eur Respir J* 1998; 11: 173-8.
37. Bula CJ, Wietlisbach V, Burnand B, Yersin B. Depressive symptoms as a predictor of 6-month outcomes and services utilization in elderly medical inpatients. *Arch Intern Med* 2001; 161: 2609-15.
38. Burack JH, Barrett DC, Stall RD, Chesney MA, Ekstrand ML, Coates TJ. Depressive symptoms and CD4 lymphocyte decline among HIV-infected men. *JAMA* 1993; 270: 2568-73.
39. Burg MM, Benedetto MC, Soufer R. Depressive symptoms and mortality two years after coronary artery bypass graft surgery (CABG) in men. *Psychosom Med* 2003; 65: 508-10.
40. Bush DE, Ziegelstein RC, Tayback M, Richter D, Stevens S, Zahalsky H, Fauerbach JA. Even minimal symptoms of depression increase mortality risk after acute myocardial infarction. *Am J Cardiol* 2001; 88: 337- 41.
41. Butler R, Orrell M, Ukoumunne OC, Bebbington P. Life events and survival in dementia: a 5-year follow-up study. *Aust N Z J Psychiatry* 2004; 38: 702-5.
42. Callahan CM, Wolinsky FD, Stump TE, Nienaber NA, Hui SL, Tierney WM. Mortality, symptoms, and functional impairment in late-life depression. *J Gen Intern Med* 1998; 13: 746-52.
43. Carney RM, Rich MW, Freedland KE, Saini J, Tevelde A, Clark CS. Major depressive disorder predicts cardiac events in patients with coronary artery disease. *Psychosom Med* 1988; 50: 627-33.
44. Chen ML, Chen MC, Yu CT. Depressive symptoms during the first chemotherapy cycle predict mortality in patients with advanced non-small cell lung cancer. *Support Care Cancer* 2011; 19: 1705-11.
45. Chilcot J, Davenport A, Wellsted D, Firth J, Farrington K. An association between depressive symptoms and survival in incident dialysis patients. *Nephrol Dial Transplant* 2011; 26: 1628-34
46. Chung ML, Lennie TA, Riegel B, Wu JR, Dekker RL, Moser DK. Marital status as an independent predictor of event-free survival of patients with heart failure. *Am J Crit Care* 2009; 18: 562-70.
47. Clausen T, Wilson AO, Molebatsi RM, Ottesen GH. Diminished mental- and physical function and lack of social support are associated with shorter survival in community dwelling older persons of Botswana. *BMC Public Health* 2007; 7: 144.
48. Clouse RE, Lustman PJ, Freedland KE, Griffith LS, McCill JB, Garney RM. Depression and coronary heart disease in women with diabetes. *Psychosom Med* 2003; 65: 376-83.
49. Cohen L, Cole SW, Sood AK, Prinsloo S, Kirschbaum C, Arevalo JM, Jennings NB, Scott S, Vence L, Wei Q, Kentor D, Radvanyi L, Tannir N, Jonasch E, Tamboli P, Pisters L. Depressive symptoms and cortisol rhythmicity predict survival in patients with renal cell carcinoma: Role of inflammatory signaling. *PLoS ONE* 2012; 7:8.

50. Connerney I, Sloan RP, Shapiro PA, Bagiella E, Seckman C. Depression Is associated with increased mortality 10 years after coronary artery bypass surgery. *Psychosomatic Medicine* 2010; 72: 874-881
51. Corruble E, Barry C, Varescon I, Falissard B, Castaing D, Samuel D. Depressive symptoms predict long-term mortality after liver transplantation. *Journal of Psychosomatic Research* 2011; 71: 32-7
52. Corsonello A, Pedone C, Lattanzio F, Cherubini A, Onder G, Corica F, Pranno L, Mari V, Laino I, Garasto S, Antonelli Incalzi R. Chronic kidney disease and 1-year survival in elderly patients discharged from acute care hospitals: A comparison of three glomerular filtration rate equations. *Nephrol Dial Transplant* 2011; 26: 360-4.
53. Damen NL, Pelle AJ, Boersma E, Serruys PW, van Domburg RT, Pedersen SS. Reduced positive affect (anhedonia) is independently associated with 7-year mortality in patients treated with percutaneous coronary intervention: results from the RESEARCH registry. *Eur J Prev Cardiol* 2013; 20: 127-34.
54. Davidson IA, Dewey ME, Copeland JRM. The relationship between mortality and mental disorder: evidence from the Liverpool longitudinal study. *Int J Geriatr Psychiatry* 1988; 3: 95-8.
55. de Guevara MS, Schaufele SI, Nicola-Siri LC, Fahrner RD, Ortiz-Fragola, Martinez-Martinez, Cardinali DP, Guinjoan DM. Worsening of depressive symptoms 6 months after an acute coronary event in older adults is associated with impairment of cardiac autonomic function. *J Affect Disord* 2004; 80: 257-62.
56. de la Camara C, Saz P, Lopez-Anton R, Ventura T, Dia JL, Lobo A. Depression in the elderly community: II. Outcome in a 4.5 years follow-up. *European Journal of Psychiatry* 2008; 22: 141-50.
57. De Schutter A, Lavie CJ, Milani RV. Relative importance of comorbid psychological symptoms in patients with depressive symptoms following phase II cardiac rehabilitation. *Postgrad Med* 2011; 123: 72-8.
58. de Voogd JN, Wempe JB, Koeter GH, Postema K, van Sonderen E, Ranchor AV, Coyne JC, Sanderman R. Depressive symptoms as predictors of mortality in patients with COPD. *Chest* 2009; 135: 619-25.
59. Denollet J, Maas K, Knottnerus A, Keyzer JJ, Pop VJ. Anxiety predicted premature all-cause and cardiovascular death in a 10-year follow-up of middle-aged women. *J Clin Epidemiol* 2009; 62: 452-6.
60. Denollet J, Sys SU, Brutsaert DL. Personality and mortality after myocardial-infarction. *Psychosom Med* 1995; 57: 582-91.
61. Denollet J, Sys SU, Stroobant N, Rombouts H, Gillebert TC, Brutsaert DL. Personality as independent predictor of long-term mortality in patients with coronary heart disease. *Lancet* 1996; 347: 417-21.
62. Diefenthaler EC, Wagner MB, Poli-de-Figueiredo CE, Zimmermann PR, Saitovitch D. Is depression a risk factor for mortality in chronic hemodialysis patients? *Rev Bras Psiquiatr* 2008; 30: 99-103.
63. Diez-Quevedo C, Lupón J, González B, Urrutia A, Cano L, Cabanes R, Altimir S, Coll R, Pascual T, de Antonio M, Bayes-Genis A. Depression, antidepressants, and long-term mortality in heart failure. *Int J Cardiol* 2013; 167:1217-25.

64. Doyle F, Conroy R, McGee H. Differential predictive value of depressive versus anxiety symptoms in the prediction of 8-year mortality after acute coronary syndrome." *Psychosom Med* 2012; 74: 711-6.
65. Drago S, Bergerone S, Anselmino M, Varalda PG, Cascio B, Palumbo L, Angelini G, Trevi PG. Depression in patients with acute myocardial infarction: influence on autonomic nervous system and prognostic role. Results of a five-year follow-up study. *Int J Cardiol* 2007; 115: 46-51.
66. Einwohner R, Bernadini J, Fried L, Piraino B. The effect of depressive symptoms on survival in peritoneal dialysis patients. *Peritoneal Dialysis International* 2004; 24: 256-63.
67. Engedal K. Mortality in the elderly: A 3-year follow-up of an elderly community sample. *Int J Geriatr Psychiatry* 1996; 11: 467-71.
68. Enzell K. Mortality among persons with depressive symptoms and among responders and non-responders in a health check-up. An investigation of persons born in 1905 and followed up from age 66 to 75. *Acta Psychiatr Scand* 1984; 69: 89-102.
69. Espauella J, Arnau A, Cubi D, Amblas J, Yanez A. Time-dependent prognostic factors of 6-month mortality in frail elderly patients admitted to post-acute care. *Age Ageing* 2007; 36: 407-13.
70. Evans ME. Depression in elderly physically ill in-patients: a 12-month prospective study. *Int Clin Psychopharmacol* 1993; 8: 333-6.
71. Everson-Rose, S. A., J. S. House, House, JS, Mero RP. Depressive symptoms and mortality risk in a national sample: confounding effects of health status. *Psychosom Med* 2004; 66: 823-30.
72. Faller H, Stork S, Schowalter M, Steinbuchel T, Wollner V, Ertl G, Angermann CE. Depression and survival in chronic heart failure: does gender play a role? *Eur J Heart Fail* 2007; 9: 1018-23.
73. Favaro A, Gerosa G, Caforio AL, Volpe B, Rupolo G, Zarneri D, Boscolo s, Pavan C, Tenconi E, d'Agostino c, Moz M, Torrerossa G, Feltrin G, Gambino A, Santonastaso P. Posttraumatic stress disorder and depression in heart transplantation recipients: the relationship with outcome and adherence to medical treatment. *Gen Hosp Psychiatry* 2011; 33: 1-7.
74. Feng L, Bee Yap K, Ng TP. Depressive symptoms in older adults with chronic kidney disease: Mortality, quality of life outcomes, and correlates. *Am J Geriatr Psychiatry* 2013; 21: 570-9.
75. Ford DE, Mead LA, Chang PP, Cooper-Patrick L, Wang NY, Klag MJ. Depression is a risk factor for coronary artery disease in men: the precursors study. *Arch Intern Med* 1998; 158: 1422-26.
76. Fortes C, Mastroeni S, Sperati A, Pacifici R, Zuccaro P, Francesco F, Agabiti N, Piras G, Amleto D, Ebrahim S. Walking four times weekly for at least 15min is associated with longevity in a Cohort of very elderly people. *Maturitas* 2013; 74: 246-51.
77. Frasure-Smith N, Lespérance F, Talajic M. Depression and 18-month prognosis after myocardial infarction. *Circulation* 1995; 91: 999-1005.
78. Fredman L, Magaziner J, Hebel JR, Hawkes W, Zimmerman SI. Depressive symptoms and 6-year mortality among elderly community-dwelling women. *Epidemiology* 1999; 10: 54-9.
79. Fredman L, Schoenbach VJ, Kaplan BH, Blazer DG, James SA, Kleinbaum DG, Yankaskas B. The association between depressive symptoms and mortality among older

- participants in the Epidemiologic Catchment Area-Piedmont Health Survey. *J. Gerontol.* 1989; 44: S149-56.
80. Freedland KE, Carney RM, Rich MW, Caracciolo A, Krottenberg JA, Smith LJ, Sperry J. Depression in elderly patients with congestive heart failure. *J Geriatr Psychiatry* 1991; 24: 59-71.
  81. French AL, Gawel SH, Hershow R, Benning L, Hessol NA, Levine AM, Anastos K, Augenbraun M, Cohen MH. Trends in mortality and causes of death among women with HIV in the United States: a 10-year study. *J Acquir Immune Defic Syndr* 2009; 51: 399-406.
  82. Fu CC, Lee YM, Chen JD. Association between depressive symptoms and twelve-year mortality among elderly in a rural community in Taiwan. *J Formos Med Assoc* 2003; 102: 234-9.
  83. Fuhrer R, Dufouil C, Antonucci TC, Shipley MJ, Helmer C, Dartigues JF. Psychological disorder and mortality in French older adults: do social relations modify the association? *Am J Epidemiol* 1999; 149: 116-26.
  84. Gale CR, Batty GD, Osborn DPJ, Tynelius P, Whitley E, Rasmussen F. Association of mental disorders in early adulthood and later psychiatric hospital admissions and mortality in a cohort study of more than 1 million men. *Arch Gen Psychiatry* 2012; 69: 823-31.
  85. Gallo JJ, Rabins PV, Lyketsos CG, Tien AY, Anthony JC. Depression without sadness: functional outcomes of nondysphoric depression in later life. *J Am Geriatr Soc* 1997; 45: 570-8.
  86. Ganzini L, Smith DM, Fenn DS, Lee MA. Depression and mortality in medically ill older adults. *J Am Geriatr Soc* 1997; 45: 307-12.
  87. Grace SL, Abbey SE, Kapral MK, Fang J, Nolan RP, Stewart DE. Effect of depression on five-year mortality after an acute coronary syndrome. *Am J Cardiol* 2005; 96: 1179-85.
  88. Gripp S, Moeller S, Bolke E, Schmitt G, Matuschek C, Asgari S, Asgharzadeh F, Roth S, Budach W, Franz M, Willers R. Survival prediction in terminally ill cancer patients by clinical estimates, laboratory tests, and self-rated anxiety and depression. *J Clin Oncol* 2007; 25: 3313-20.
  89. Groenvold M, Peterson MA, Idler E, Bjorner JB, Fayers PM, Mouridsen HT. Psychological distress and fatigue predicted recurrence and survival in primary breast cancer patients. *Breast Cancer Res Treat.* 2007; 105: 209-19.
  90. Grool AM, van der Graaf Y, Mali WP, Witkamp TD, Vincken KL, Geerlings MI; SMART Study Group. Mood problems increase the risk of mortality in patients with lacunar infarcts: The SMART-MR study. *Psychosom Med* 2012; 74: 234-40.
  91. Gudmundsson G, Ulrik CS, Gislason T, Lindberg E, Brøndum E, Bakke P, Janson C. Long-term survival in patients hospitalized for chronic obstructive pulmonary disease: A prospective observational study in the Nordic countries. *Int J COPD* 2012; 7: 571-6.
  92. Guerini F, Morghen S, Lucchi E, Bellelli G, Trabucchi M. Depressive symptoms and one year mortality among elderly patients discharged from a rehabilitation ward after orthopaedic surgery of the lower limbs. *Behavioural Neurology* 2010; 23: 117-21
  93. Hamer M, Bates CJ, Mishra GD. Depression, physical function, and risk of mortality: National Diet and Nutrition Survey in adults older than 65 years. *Am J Geriatr Psychiatry* 2011; 19: 72-8

94. Haukkala A, Konttinen H, Uutela A, Kawachi I, Laatikainen T. Gender differences in the associations between depressive symptoms, cardiovascular diseases, and all-cause mortality. *Ann Epidemiol* 2009; 19: 623-9.
95. Havik, O. E., B. Sivertsen, Relbo A, Hellesvik M, Grov I, Geiran O, Andreassen AK, Simonsen S, Gullestad L. Depressive symptoms and all-cause mortality after heart transplantation. *Transplantation* 2007; 84: 97-103.
96. Hayashi, T., H. Nomura, Osawa M, Funami J, Miyazaki A, Iguchi A. Nitric oxide metabolites are associated with survival in older patients. *J Am Geriatr Soc* 2007; 55: 1398-403.
97. Hedayati SS, Jiang W, O'Connor CM, Kuchibhatla M, Krishnan KR, Cuffe MS, Blazing MA, Szczech LA. The association between depression and chronic kidney disease and mortality among patients hospitalized with congestive heart failure. *Am J Kidney Dis* 2004; 44: 207-15.
98. Hedayati, SS, Minhajuddin AT, Afschar M, Toto RD, Trivedi MH, Rush AJ. Association between major depressive episodes in patients with chronic kidney disease and initiation of dialysis, hospitalization, or death. *JAMA* 2010; 303: 1946-53.
99. Helmer C, Barberger-Gateau P, Letenneur L, Dartigues JF. Subjective health and mortality in French elderly women and men. *J Gerontol B Psychol Sci Soc Sci* 1999; 54: S84-92.
100. Henderson AS, Korten AE, Jacomb PA, Mackinnon AJ, Jorm AF, Christensen H, Rodgers B. The course of depression in the elderly: A longitudinal community-based study in Australia. *Psychol Med* 1997; 27: 119-29.
101. Herrmann C, Brand-Driehorst S, Kaminsky B, Leibing E, Staats H, Ruger U. Diagnostic groups and depressed mood as predictors of 22-month mortality in medical inpatients. *Psychosom Med* 1998; 60: 570-77.
102. Herrmann-Lingen, C., H. Klemme, Meyer T. Depressed mood, physician-rated prognosis, and comorbidity as independent predictors of 1-year mortality in consecutive medical inpatients. *J Psychosom Res* 2001; 50: 295-301.
103. Hjaltadottir I, Hallberg IR, Ekwall AK, Nybreg P. Predicting mortality of residents at admission to nursing home: a longitudinal cohort study. *BMC Health Serv Res* 2011; 11: 86.
104. Ho PM, Masoudi FA, Spertus JA, Peterson PN, Shroyer AL, McCarthy M, Grover FL, Hammermeister KE, Rumsfeld JS. Depression predicts mortality following cardiac valve surgery. *Ann Thorac Surg* 2005; 79: 1255-9.
105. Hoch CC, Reynolds CF, Buysse DJ, Fasiczka AL, Houck PR, Mazumdar S, Kupfer DJ. Two-year survival in patients with mixed symptoms of depression and cognitive impairment: Comparison with major depression and primary degenerative dementia. *Am J Geriatr Psychiatry* 1993; 1: 59-66.
106. Holmes J, House A. Psychiatric illness predicts poor outcome after surgery for hip fracture: a prospective cohort study. *Psychol Med* 2000; 30: 921-9.
107. Hosseini SH, Yousefnejad K, Tabiban S, Nesarhoseyni V, Bagheri B, Kiasari AM, Ghaemian A, Ghadirnejad SN, Lolati HA, Amir FN, Ashraf H, Mokhberi V. Effects of depression and anxiety symptoms on cardiac mortality following myocardial infarction: A 2-year follow-up. *Int J Psychiatry Clin Pract* 2011; 15: 91-6.
108. Hughes TA, Ross HF, Mindham RHS, Spokes EGS. Mortality in Parkinson's disease and its association with dementia and depression. *Acta Neurol Scand* 2004; 110: 118-23.

109. Imai H, Ishimoto Y, Kimura Y, Fukutomi E, Chen WL. Activities of daily living rather than depressive symptoms increase the risk of mortality in Japanese community-dwelling elderly people: A 4-year longitudinal survey. *J Am Geriatr Soc* 2012; 60: 1191-3.
110. Inouye SK, Peduzzi PN, Robison JT, Hughes JS, Horwitz RI, Concato J. Importance of functional measures in predicting mortality among older hospitalized patients. *JAMA* 1998; 279: 1187-93.
111. Ismail K, Winkley K, Stahl D, Chalder T, Edmonds M. A cohort study of people with diabetes and their first foot ulcer: the role of depression on mortality. *Diabetes Care* 2007; 30: 1473-9.
112. Iversen MM, Tell GS, Riise T, Hanestad BR, Ostbye T, Graue M, Midthjell K. History of foot ulcer increases mortality among individuals with diabetes: ten-year follow-up of the Nord-Trondelag Health Study, Norway. *Diabetes Care* 2009; 32: 2193-9.
113. Janzing JG, Bouwens JM, Teunisse RJ, van't Hof MA, Zitman FG. The relationship between depression and mortality in elderly subjects with less severe dementia. *Psychol Med* 1999; 29: 979-83.
114. Jiang W, Alexander J, Christopher E, Kuchibhatla M, Gauden LH, Cuffe MS, Blazing MA, Davenport C, Califf RM, Krishnan RR, O'Connor CM. Relationship of depression to increased risk of mortality and rehospitalization in patients with congestive heart failure. *Arch Intern Med* 2001; 161: 1849-56.
115. Jiang W, Kuchibhatla M, Clary GL, Cuffe MS, Christopher EJ, Alexander JD, Califf RM, Krishnan RR, O'Connor CM. Relationship between depressive symptoms and long-term mortality in patients with heart failure. *Am Heart J* 2007; 154: 102-8.
116. Jorm AF, Henderson AS, Kay DWK, Jacomb PA. Mortality in relation to dementia, depression and social integration in an elderly community sample. *Int J Geriatr Psychiatry* 1991; 6: 5-11.
117. Joukamaa M, Heliovaara M, Knekt P, Aromaa A, Raitasalo R, Lehtinen V. Mental disorders and cause-specific mortality. *British Journal of Psychiatry* 2001; 179: 498-502.
118. Jubran A, Lawm G, Kelly J, Duffner LA, Gungor G, Collins EG, Lanuza DM, Hoffman LA, Tobin MJ. Depressive disorders during weaning from prolonged mechanical ventilation. *Intensive Care Medicine* 2010; 36: 828-35.
119. Junger J, Schellberg D, Muller-Tasch T, Raupp G, Zugck C, Haunstetter A, Zipfel S, Herzog W, Haass M. Depression increasingly predicts mortality in the course of congestive heart failure. *Eur J Heart Fail* 2005; 7: 261-7.
120. Kaplan GA, Baltrus PT, Raghunathan TE. The shape of health to come: prospective study of the determinants of 30-year health trajectories in the Alameda County Study. *Int J Epidemiol* 2007; 36: 542-8.
121. Karvonen-Gutierrez CA, Ronis DL, Fowler KE, Terrell JE, Gruber SB, Duffy SA. Quality of life scores predict survival among patients with head and neck cancer. *Journal of Clinical Oncology* 2008; 26: 2754-60.
122. Kato N, Kinugawa K, Yao A, Hatano M, Shiga T, Kazuma K. Relationship of depressive symptoms with hospitalization and death in Japanese patients with heart failure. *J Card Fail* 2009; 15: 912-9.
123. Katon WJ, Rutter C, Simon G, Lin EHB, Ludman E, Ciechanowski P, Kinder L, Young B, Von Korff M. The association of comorbid depression with mortality in patients with type 2 diabetes. *Diabetes Care* 2005; 28: 2668-72.

124. Katz IR, Leshner E, Kleban M, Jethanandani V, Parmelee P. Clinical features of depression in the nursing home. *Int Psychogeriatr* 1989; 1: 5-15.
125. Kaufmann MW, Fitzgibbons JP, Sussman EJ, Reed JF 3rd, Einfalt JM, Rodgers JK, Fricchione GL. Relation between myocardial infarction, depression, hostility, and death. *Am Heart J* 1999; 138: 549-54.
126. Kawamura T, Shioiri T, Takahashi K, Ozdemir V, Someya T. Survival rate and causes of mortality in the elderly with depression : a 15-year prospective study of a Japanese community sample, the Matsunoyama-Niigata suicide prevention project. *Journal of Investigative Medicine* 2007; 55: 106-14.
127. Kerr WC, Greenfield TK, Bond J, Ye Y, Rehm J. Racial and ethnic differences in all-cause mortality risk according to alcohol consumption patterns in the national alcohol surveys. *Am J Epidemiol* 2011; 174: 769-78.
128. Koenig HG. Depression in hospitalized older patients with congestive heart failure. *Gen Hosp Psychiatry* 1998; 20: 29-43.
129. Koenig HG, George LK, Larson DB, McCullough ME, Branch PS, Kuchtbhatla M. Depressive symptoms and nine-year survival of 1,001 male veterans hospitalized with medical illness. *Am J Geriatr Psychiatry* 1999; 7: 124-31.
130. Köhler S, Verhey F, Weyerer S, Wiese B, Hesser K, Wagner M, Pentzek M, Fuchs A, Köhler M, Bachmann C, Riedel Heller SG, Lupp M, Eifflaender-Gorfer S, Werle J, Bickel H, Mösch E, König HH, Brettschneider C, Scherer M, Maier W. Depression, non-fatal stroke and all-cause mortality in old age: A prospective cohort study of primary care patients. *J Affect Disord* 2013;150: 63-9.
131. Kojima M, Hayano J, Suzuki S, Seno H, Kasuqa H, Takahashi H, Toriyama T, Kawahara H, Furukawa TA. Depression, alexithymia and long-term mortality in chronic hemodialysis patients. *Psychother Psychosom* 2010; 79: 303-11
132. Kopp MS, Skrabski A, Laszlo KD, Janszky I. Gender patterns of socioeconomic differences in premature mortality: follow-up of the Hungarian Epidemiological Panel. *Int J Behav Med* 2011; 18: 22-34.
133. Kouzis A, Eaton WW, Leaf PJ. Psychopathology and mortality in the general population. *Soc Psychiatry Psychiatr Epidemiol* 1995; 30: 165-70.
134. Krause JS, Carter RE, Pickelsimer EE, Wilson D. A prospective study of health and risk of mortality after spinal cord injury. *Arch Phys Med Rehabil* 2008; 89: 1482-91.
135. Kronish IM, Rieckmann N, Schwartz JE, Schwartz DR, Davidson KW. Is depression after an acute coronary syndrome simply a marker of known prognostic factors for mortality? *Psychosom Med* 2009; 71: 697-703.
136. Kuo PL, Pu C. The contribution of depression to mortality among elderly with self-reported hypertension: analysis using a national representative longitudinal survey. *J Hypertens* 2011; 29: 2084-90.
137. Kuo YF, Raji MA, Peek MK, Goodwin JS. Health-related social disengagement in elderly diabetic patients: association with subsequent disability and survival. *Diabetes Care* 2004; 27: 1630-7.
138. Kurdyak PA, Gnam WH, Goering P, Chong A, Alter DA. The relationship between depressive symptoms, health service consumption, and prognosis after acute myocardial infarction: a prospective cohort study. *BMC Health Serv Res* 2008; 8: 200.



139. Kuzuya M, Masuda Y, Hirakawa Y, Iwata M, Enoki H, Hasegawa J, Iguchi A. Day care service use is associated with lower mortality in community-dwelling frail older people. *J Am Geriatr Soc* 2006; 54: 1364-71.
140. Lacson E, Li NC, Guerra-Dean S, Lazarus M, Hakim R, Finkelstein FO. Depressive symptoms associate with high mortality risk and dialysis withdrawal in incident hemodialysis patients. *Nephrol Dial Transplant* 2012; 27: 2921-8.
141. Ladwig KH, Marten-Mittag B, Baumert J, MONICA/KORA-Studiengruppe. [Psychosocial factors as risk for coronary heart disease--status with special reference to the KORA platform]. *Gesundheitswesen* 2005; 67: S86-93.
142. Lane D, Carroll D, Ring C, Beevers DG, Lip GYH. Mortality and quality of life 12 months after myocardial infarction: effects of depression and anxiety. *Psychosom Med* 2001; 63:221-30.
143. Lauzon C, Beck CA, Huynh T, Dion D, Racine N, Carignan S, Diodati JG, Charbonneau F, Dupuis R, Pilote L. Depression and prognosis following hospital admission because of acute myocardial infarction. *CMAJ* 2003; 168: 547-52.
144. Lavretsky H, Zheng L. Association of depressed mood and mortality in older adults with and without cognitive impairment in a prospective naturalistic study. *Am J Psychiatry* 2010; 167: 589-97.
145. Lesperance F, Frasere-Smith N, Juneau M, Theroux P. Depression and 1-year prognosis in unstable angina. *Arch Intern Med* 2000; 160: 1354-60.
146. Liebetrau M, Steen B, Skoog I. Depression as a risk factor for the incidence of first-ever stroke in 85-year-olds. *Stroke* 2008; 39: 1960-5.
147. Lindesay J. Nonsuicidal mortality in late-life depression. *J Geriatr Psychiatry* 1989; 22: 53-65
148. Lo RY, Tanner CM, Albers KB, Leimpeter AD, Fross RD, Bernstein AL, McGutre V, Quesenberry CP, Nelson LM, Van Den Eeden SK. Clinical features in early Parkinson disease and survival. *Arch Neurol* 2009; 66: 1353-8.
149. Loberiza FR, Rizzo JD, Bredeson CN, Antin JH, Horowitz MM, Weeks JC, Lee SJ. Association of depressive syndrome and early deaths among patients after stem-cell transplantation for malignant diseases. *Journal of Clinical Oncology* 2002; 20: 2118-26.
150. Lupon J, Gonzalez B, Santauegenia S, Altimir S, Urrutia A, Mas D, Diez C, Pascual T, Cano L, Valle V. Prognostic implication of frailty and depressive symptoms in an outpatient population with heart failure. *Rev Esp Cardiol* 2008; 61: 835-42.
151. Luukinen H, Laippala P, Huikuri HV. Depressive symptoms and the risk of sudden cardiac death among the elderly. *Eur Heart J* 2003; 24: 2021-6.
152. Luutonen S, Holm H, Salminen JK, Risla A, Salokangas RK. Inadequate treatment of depression after myocardial infarction. *Acta Psychiatr Scand* 2002; 106: 434-9.
153. Lyketsos CG, Hoover DR, Guccione M. Depression and survival among HIV-infected persons. *JAMA* 1996; 275: 35-6.
154. Mainio A, Tuunanen S, Hakko H, Niemela A, Koivukangas J, Rasanen P. Decreased quality of life and depression as predictors for shorter survival among patients with lowgrade gliomas: a follow-up from 1990 to 2003. *Eur Arch Psychiatry Clin Neurosci* 2006; 256: 516-21.
155. Mallon L, Broman J, Hetta J. Sleep complaints predict coronary artery disease mortality in males: a 12-year follow-up study of a middle-aged Swedish population. *J Intern Med* 2002; 251: 207-16.

156. Marckula N, Härkänen T, Perälä J, Partti K, Peña S, Koskinen S, Lönnqvist J, Suvisaari J, Saarni SI. Mortality in people with depressive, anxiety and alcohol use disorders in Finland. *Br J Psychiatry* 2012; 200: 143-9.
157. Marzari C, Maggi S, Manzato E, Destro C, Noale M, Bianchi D, Minicuci N, Farchi G, Baldereschi M, Di Carlo A. Depressive symptoms and development of coronary heart disease events: the Italian longitudinal study on aging. *J Gerontol A Biol Sci Med Sci* 2005; 60: 85-92.
158. Mayne TJ, Vittinghoff E, Chesney MA, Barrett DC, Coates TJ. Depressive affect and survival among gay and bisexual men infected with HIV. *Arch Intern Med* 1996; 156: 2233-8.
159. McCusker J, Cole M, Ciampi A, Latimer E, Windholz S, Belzile E. Does Depression in Older Medical Inpatients Predict Mortality? *The Journals of Gerontology: Series A: Biological Sciences and Medical Sciences* 2006; 61A: 975-81.
160. Mehta J, Bhatt PA, Parikh K. A prospective study to evaluate correlation between coronary heart disease and depression and its influence on quality of life and clinical outcomes. *J Am Coll Cardiol* 2013; 61: E1478.
161. Mehta KM, Yaffe K, Langa KM, Sands L, Whooley MA, Covinsky KE. Additive effects of cognitive function and depressive symptoms on mortality in elderly community-living adults. *J Gerontol A Biol Sci Med Sci* 2003; 58: 461-7.
162. Melkas S, Vataja R, Oksala NK, Jokinen H, Pohjasvaara T, Oksala A, Leppavuori A, Kaste M, Karhunen PJ, Erkinjuntti T. Depression-executive dysfunction syndrome relates to poor poststroke survival. *Am J Geriatr Psychiatry* 2010; 18: 1007-16.
163. Meller I, Fichter MM, Schröppel H. Mortality risk in the octo- and nonagenarians: longitudinal results of an epidemiological follow-up community study. *Eur Arch Psychiatry Clin Neurosci* 1999; 249: 180-9.
164. Miu DK, Chan CK. Prognostic value of depressive symptoms on mortality, morbidity and nursing home admission in older people. *Geriatr Gerontol Int* 2011; 11: 174-9
165. Mogga S, Prince M, Alem A, Kebede D, Stewart R, Glozier N, Hotopf M. Outcome of major depression in Ethiopia: population-based study. *Br J Psychiatry* 2006; 189: 241-6.
166. Mollica RF, Sarajlic N, Chernoff M, Lavelle J, Vukovic IS, Massagli MP. Longitudinal study of psychiatric symptoms, disability, mortality, and emigration among Bosnian refugees. *JAMA* 2001; 286: 546-54.
167. Moraska AR, Chamberlain AM, Shah ND, Vickers KS, Rummans TA, Dunlay SM, Spertus JA, Weston SA, McNallan SM, Redfield MM, Roger VL. Depression, Healthcare Utilization, and Death in Heart Failure: A Community Study." *Circ Heart Fail* 2013; 6: 387-94.
168. Morgenstern LB, Sánchez BN, Skolarus LE, Garcia N, Risser JM, Wing JJ, Smith MA, Zahuranec DB, Lisabeth LD. Fatalism, optimism, spirituality, depressive symptoms, and stroke outcome: a population-based analysis. *Stroke* 2011; 42: 3518-23.
169. Morris PL, Robinson RG, Andrzejewski P, Samuels J, Price TR. Association of depression with 10-year poststroke mortality. *Am J Psychiatry* 1993; 150: 124-9.
170. Morris PL, Robinson RG, Samuels J. Depression, introversion and mortality following stroke. *Aust N Z J Psychiatry* 1993; 27: 443-9.
171. Mroczek DK, Spiro A. Personality change influences mortality in older men. *Psychol Sci* 2007; 18: 371-6.

172. Murphy B, Rogerson M, Worcester M, Elliott P, Higgins R, Le Grande M, Turner A, Goble A. Predicting Mortality 12 Years After an Acute Cardiac Event: Comparison between in-hospital and 2-month assessment of depressive symptoms in women. *J Cardiopulm Rehabil Prev* 2013; 33: 160-7.
173. Murphy E, Smith R, Lindsay J, Slattery J. Increased mortality rates in late-life depression. *Br J Psychiatry* 1988; 152: 347-53.
174. Murphy JM, Burke JD Jr, Manson RR, Horton NJ, Laird NM, Lesage A, Sobol AM, Leighton AH. Mortality associated with depression: a forty-year perspective from the Stirling County Study. *Soc Psychiatry Psychiatr Epidemiol* 2008; 43: 594-601.
175. Mykletun A, Bjerkeset O, Dewey M, Prince M, Overland S, Stewart R. Anxiety, depression, and cause-specific mortality: the HUNT study. *Psychosom Med* 2007; 69: 323-31.
176. Nabi H, Shipley MJ, Vahtera J, Hall M, Korkeila J, Marmot MG, Kivimaki M, Singh-Manoux A. Effects of depressive symptoms and coronary heart disease and their interactive associations on mortality in middle-aged adults: the Whitehall II cohort study. *Heart* 2010; 96: 1645-50.
177. Nakaya N, Saito-Nakaya K, Akechi T, Kuriyama S, Inagaki M, Kikuchi N, Nagai K, Tsugane S, Nishiwaki Y, Tsuji I, Uchitomi Y. Negative psychological aspects and survival in lung cancer patients. *Psycho-Oncology* 2008; 17: 466-73.
178. Nakaya N, Saito-Nakaya K, Akizuki N, Yoshikawa E, Kobayakawa M, Fujimori M, Nagai K, Nishiwaki Y, Fukudo S, Tsubono Y, Uchitomi Y. Depression and survival in patients with non-small cell lung cancer after curative resection : a preliminary study. *Cancer Sci* 2006; 97: 199-205.
179. Ng TP, Niti M, Tan WC, Cao Z, Ong KC, Eng P. Depressive symptoms and chronic obstructive pulmonary disease: effect on mortality, hospital readmission, symptom burden, functional status, and quality of life. *Arch Intern Med* 2007; 167: 60-7.
180. Nightingale S, Holmes J, Manson J, House A. Psychiatric illness and mortality after hip fracture. *Lancet* 2001; 357: 1264-5.
181. Novak M, Molnar MZ, Szeifert L, Kovacs AZ, Vamos EP, Zoller R, Keszei A, Mucsi I. Depressive Symptoms and Mortality in Patients After Kidney Transplantation: A Prospective Prevalent Cohort Study. *Psychosom Med*. 2010; 72: 527-34
182. O'Connor BP, Vallerand RJ. Psychological adjustment variables as predictors of mortality among nursing home residents. *Psychology and Aging* 1998; 13: 368-74.
183. O'Connor CM, Jiang W, Kuchbhatla M, Mehta RH, Clary GL, Cuffe MS, Christopher EJ, Alexander JD, Califf RM, Krishnan RR. Antidepressant use, depression, and survival in patients with heart failure. *Arch Intern Med* 2008; 168: 2232-7.
184. Okura T, Plassman BL, Steffens DC, Llewellyn DJ, Potter GG, Langa KM. Neuropsychiatric symptoms and the risk of institutionalization and death: The aging, demographics, and memory study. *J Am Geriatr Soc* 2011; 59: 473-81
185. Onitilo AA, Nietert PJ, Egede LE. Effect of depression on all-cause mortality in adults with cancer and differential effects by cancer site. *Gen Hosp Psychiatry*. 2006; 28: 396-402.
186. Page-Shafer K, Delorenze GN, Satariano WA, Winkelstein W Jr. Comorbidity and survival in HIV-infected men in the San Francisco Men's Health Survey. *Ann Epidemiol* 1996; 6: 420-30.

187. Pan A, Lucas M, Sun Q, Van Dam RM, Franco OH, Willett WC, Manson JE, Rexrode KM, Ascherio A, Hu FB. Increased mortality risk in women with depression and diabetes mellitus. *Arch Gen Psychiatry* 2011; 68: 42-50
188. Papaioannou AI, Bartziokas K, Tsikrika S, Karakontaki F, Kastanakis E, Banya W, Haniotou A, Papisiris S, Loukides S, Polychronopoulos V, Kostikas K. The impact of depressive symptoms on recovery and outcome of hospitalised COPD exacerbations. *Eur Respir J* 2013; 41: 815-23.
189. Parakh K, Thombs BD, Fauerbach JA, Bush DE, Ziegelstein RC. Effect of depression on late (8 years) mortality after myocardial infarction. *Am J Cardiol* 2008; 101: 602-6.
190. Parashar S, Rumsfeld JS, Spertus JA, Reid KJ, Wenger NK, Krumholz HM, Amin A, Weintraub WS, Lichtman J, Dawood N, Vaccarino V. Time course of depression and outcome of myocardial infarction. *Arch Intern Med* 2006; 166: 2035-43.
191. Parmelee PA, Katz IR, Lawton MP. Depression and mortality among institutionalized aged. *J Gerontol* 1992; 47: 3-10.
192. Patten SB, Williams JVA, Lavorato D, Wang JL, Khaled S, Bulloch AGM. Mortality associated with major depression in a Canadian community cohort. *Can J Psychiatry* 2011; 56: 658-66.
193. Pelle AJ, Pedersen SS, Schiffer AA, Szabo B, Widdershoven JW, Denollet J. Psychological distress and mortality in systolic heart failure. *Circ Heart Fail* 2010; 3: 261-7.
194. Penninx BW, Geerlings SW, Deeg DJ, Van Eijk JT, Van Tilburg W, Beekman AT. Minor and major depression and the risk of death in older persons. *Arch. Gen Psychiatry* 1999; 56: 889-95.
195. Penninx BW, Guralnik JM, Bandeen-Roche K, Kasper JD, Simonsick EM, Ferrucci L, Fried LP. The protective effect of emotional vitality on adverse health outcomes in disabled older women. *J Am Geriatr Soc* 2000; 48: 1359-66.
196. Penninx BW, Guralnik JM, Mendes de Leon CF, Pahor M, Visser M, Corti MC, Wallace RB. Cardiovascular events and mortality in newly and chronically depressed persons > 70 years of age. *Am J Cardiol* 1998; 81: 988-94.
197. Phillips AC, Batty GD, Gale CR, Deary IJ, Osborn D, MacIntyre K, Carroll D. Generalized anxiety disorder, major depressive disorder, and their comorbidity as predictors of all-cause and cardiovascular mortality: the Vietnam experience study. *Psychosom Med* 2009; 71: 395-403.
198. Phillips KA, Osborne RH, Giles GG, Dite GS, Apicella C, Hopper JL, Milne RL. Psychosocial factors and survival of young women with breast cancer : a population-based prospective cohort study. *J Clin Oncol* 2008; 26: 4666-71.
199. Pieper L, Dirmaier J, Klotsche J, Thurau C, Pittrow D, Lehnert H, Marz E, Koch U, Wittchen HU. [Longitudinal associations between depressive symptoms and type 2 diabetes and their impact on mortality in primary care patients] Longitudinale Assoziationen zwischen depressiven Symptomen und Typ-2-Diabetes sowie deren Auswirkung auf die Mortalität von Hausarztpatienten. *Bundesgesundheitsbl* 2011; 54: 98-107.
200. Pina-Escudero SD, Navarrete-Reyes AP, Avila-Funes JA. Depressive symptoms increase the risk of mortality in older Mexican community-dwelling adults. *J Am Geriatr Soc* 2011; 59: 2171-2.

201. Pirl WF, Temel JS, Billings A, Dahlin C, Jackson V, Prigerson HG, Greer J, Lynch TJ. Depression after diagnosis of advanced non-small cell lung cancer and survival : a pilot study. *Psychosomatics* 2008; 49: 218-24.
202. Pitkala K, Kahonen-Vare M, Valvanne J, Strandberg TE, Tilvis RS. Long-term changes in mood of an aged population: repeated Zung-tests during a 10-year follow-up. *Arch Gerontol Geriatr* 2003; 36: 185-95.
203. Pitsavos C, Panagiotakos DB, Arapi S, Giannopoulos G, Masoura C, Tsiamis E, Stefanadis C. Short-term depressive symptoms and 30-day prognosis of hospitalized patients with acute coronary syndromes; the Greek study of acute coronary syndromes (GREECS). *Epidemiol Psychiatr Soc* 2007; 16: 309-15.
204. Pollak CP, Perlick D, Linsner JP, Wenston J, Hsieh F. Sleep problems in the community elderly as predictors of death and nursing home placement. *J Community Health* 1990; 15: 123-35.
205. Prieto JM, Atala J, Blanch E, Carreras E, Rovira M, Cicera E, Espinal A, Gasto C. Role of depression as a predictor of mortality among cancer patients after stem-cell transplantation. *J Clin Oncol* 2005; 23: 6063-71.
206. Prince MJ, Harwood RH, Thomas A, Mann AH. A prospective population-based cohort study of the effects of disablement and social milieu on the onset and maintenance of late-life depression. The Gospel Oak project VII. *Psychol Med* 1998; 28: 337-50.
207. Pulska T, Pahkala K, Laippala P, Kivela SL. Six-year survival of depressed elderly Finns: a community study. *Int J Geriatr Psychiatry* 1997; 12: 942-50.
208. Rapp MA, Gerstorf D, Helmchen H, Smith J. Depression predicts mortality in the young old, but not in the oldest old: results from the Berlin Aging Study. *Am J Geriatr Psychiatry* 2008; 16: 844-52.
209. Richardson JL, Zarnegar Z, Bisno B, Levine A. Psychosocial status at initiation of cancer treatment and survival. *J Psychosom Res* 1990; 34: 189-201.
210. Riezebos RK, Nauta KJ, Honig A, Dekker FW, Siegert CEH. The association of depressive symptoms with survival in a Dutch cohort of patients with end-stage renal disease. *Nephrol Dial Transplant* 2010; 25: 231-6.
211. Rollman BL, Belnap BH, Mazumdar S, Houck PR, He F, Alvarez RJ, Schulberg HC, Reynolds CF, McNamara DM. A positive 2-item Patient Health Questionnaire depression screen among hospitalized heart failure patients is associated with elevated 12-month mortality. *J Card Fail* 2012; 18: 238-45.
212. Romanelli J, Fauerbach JA, Bush DE, Ziegelstein RC. The significance of depression in older patients after myocardial infarction. *J Am Geriatr Soc* 2002; 50: 817-22.
213. Rovner BW, German PS, Brent LJ, Clark R, Burton L, Folstein MF. Depression and mortality in nursing homes. *JAMA* 1991; 265: 993-6.
214. Rozzini R, Trabucchi M. Depressive symptoms, their management, and mortality in elderly people. *J Am Geriatr Soc* 2012; 60: 989-90.
215. Rutledge T, Matthews K, Lui LY, Stone KL, Cauley JA. Social networks and marital status predict mortality in older women: prospective evidence from the Study of Osteoporotic Fractures (SOF). *Psychosom Med* 2003; 65: 688-94.
216. Rutledge T, Reis SE, Olson M, Owens J, Kelsey SF, Pepine CJ, Mankad S, Rogers WJ, Sopko G, Cornell CE, Sharaf B, Merz NB. Depression is associated with cardiac symptoms, mortality risk, and hospitalization among women with suspected coronary disease: the NHLBI-sponsored WISE study. *Psychosom Med* 2006; 68: 217-23.

217. Ryan J, Canonico M, Carcaillon L, Carrière I, Scali J, Dartigues JF, Dufouil C, Ritchie K, Scarabin PY, Ancelin ML. Hormone treatment, estrogen receptor polymorphisms and mortality: a prospective cohort study. *PloS one* 2012; 7: e34112.
218. Ryan J, Carriere I, Ritchie K, Stewart R, Toulemonde G, Dartigues JF, Tzourio C, Ancelin ML. Late-life depression and mortality: Influence of gender and antidepressant use. *Br J Psychiatry* 2008; 192: 12-8.
219. Saito-Nakaya K, Nakaya N, Akechi T, Inagaki M, Asai M, Goto K, Nagai K, Nishiwaki Y, Tsugane S, Fukudo S, Uchitomi Y. Marital status and non-small cell lung cancer survival: the lung cancer database project in Japan. *Psychooncol* 2008; 17: 869-76.
220. Saito-Nakaya K, Nakaya N, Fujimori M, Akizuki N, Yoshikawa E, Kobayakawa M, Nagai K, Nishiwaki Y, Tsubono Y, Uchitomi Y. Marital status, social support and survival after curative resection in non-small-cell lung cancer. *Cancer Science* 2006; 97: 206-13.
221. Santos PR. Evaluation of objective and subjective indicators of death in a period of one year in a sample of prevalent patients under regular hemodialysis. *BMC Res Notes* 2012 5: 24.
222. Saz P, Launer LJ, Dia JL, De-La-Camara C, Marcos G, Lobo A. Mortality and mental disorders in a Spanish elderly population. *Int J Geriatr Psychiatry* 1999; 14: 1031-8.
223. Schiffer AA, Pelle AJ, Smith ORF, Widdershoven JW, Hendriks EH, Pedersen SS. Somatic versus cognitive symptoms of depression as predictors of all-cause mortality and health status in chronic heart failure. *J Clin Psychiatry* 2009; 70: 1667-73.
224. Schleifer SJ, Macari-Hanson MM, Coyle DA, Slater WR, Kahn M, Gorlin R, Zucker HD. The nature and course of depression following myocardial infarction. *Arch Intern Med* 1989; 149: 1785-9
225. Schoevers RA, Geerlings MI, Beekman ATF, Penninx BWJH, Deeg DJH, Jonker C, van Tilburg W. Association of depression and gender with mortality in old age. Results from the Amsterdam Study of the Elderly (AMSTEL). *Br J Psychiatry* 2000; 177: 336-42.
226. Schuckit MA, Miller PL, Berman J. The three year course of psychiatric problems in a geriatric population. *J Clin Psychiatr* 1980; 41: 27-32.
227. Schulz R, Beach SR, Ives DG, Martire LM, Ariyo AA, Kop WJ. Association between depression and mortality in older adults: The Cardiovascular Health Study. *Arch Intern Med* 2000; 60:1761-8.
228. Sehlen S, Marten-Mittag B, Herschbach P, Schweden M, Book K, Henrich G, Dühmke E, Dinkel A. Health-related quality of life supersedes other psychosocial predictors of long-term survival in cancer patients undergoing radiotherapy. *Acta Oncol* 2012; 51: 1020-8.
229. Shamash K, O'Connell K, Lowy M, Katona CLE. Psychiatric morbidity and outcome in elderly patients undergoing emergency hip surgery: A one-year follow-up study. *Int J Geriatr Psychiatry* 1992; 7: 505-9.
230. Sharifi F, Ghaderpanahi M, Fakhrazadeh H, Mirarefin M, Badamchizadeh Z, Tajalizadekhoob Y, Fadayivatan R, Philp I, Larijani B. Older people's mortality index: development of a practical model for prediction of mortality in nursing homes (Kahrizak Elderly Study). *Geriatr Gerontol Int* 2012; 12: 36-45.
231. Sharma VK, Copeland JR, Dewey ME, Lowe D, Davidson I. Outcome of the depressed elderly living in the community in Liverpool: a 5-year follow-up. *Psychol Med* 1998; 28: 1329-37.

232. Shekelle RB, Raynor WJ Jr, Ostfeld AM, Garron DC, Bieliauskas LA, Liu SC, Maliza C, Paul O. Psychological depression and 17-year risk of death from cancer. *Psychosom Med* 1981; 43: 117-25.
233. Singh N, Gayowski T, Wagener MM, Marino IR. Depression in patients with cirrhosis. Impact on outcome. *Dig Dis Sci* 1997; 42: 1421-7.
234. Snowdon J, Lane F. The botany survey: A longitudinal study of depression and cognitive impairment in an elderly population. *Int J Geriatr Psychiatry* 1995; 10: 349-58.
235. St John P, Montgomery P. Does self-rated health predict death in older adults with depressive symptoms? *Can J Aging* 2012; 31: 49-54.
236. Stage KB, Middelboe T, Pisinger C. Depression and chronic obstructive pulmonary disease (COPD). Impact on survival. *Acta Psychiatr Scand* 2005; 111: 320-3.
237. Stamatakis KA, Lynch J, Everson SA, Raghunathan T, Salonen JT, Kaplan GA. Self-esteem and mortality: prospective evidence from a population-based study. *Ann Epidemiol* 2004; 14: 58-65.
238. Steel JL, Geller DA, Gamblin TC, Olek MC, Carr BI. Depression, immunity, and survival in patients with hepatobiliary carcinoma. *J Clin Oncol* 2007; 25: 2397-2405.
239. Stek ML, Vinkers DJ, Gussekloo J, Beekman ATF, van der Mast RC, Westendorp RGJ. Is depression in old age fatal only when people feel lonely? *Am J Psychiatry* 2005; 162: 178-80.
240. Steptoe A, Wardle J. Positive affect measured using ecological momentary assessment and survival in older men and women. *Proc Nat Acad Sc* 2011; 108: 18244-8.
241. Stern SL, Dhanda R, Hazuda HP. Hopelessness predicts mortality in older Mexican and European Americans. *Psychosom Med* 2001; 63: 344-51.
242. Stommel M, Given BA, Given CW. Depression and functional status as predictors of death among cancer patients. *Cancer* 2002; 94: 2719-27.
243. Sudore RL, Karter AJ, Huang ES, Moffet HH, Laiteerapong N, Schenker Y, Adams A, Whitmer RA, Liu JY, Miao Y, John PM, Schillinger D. Symptom burden of adults with type 2 diabetes across the disease course: Diabetes & Aging Study. *J Gen Int Med* 2012; 27: 1674-81.
244. Sullivan MD, LaCroix AZ, Spertus JA, Hecht J, Russo J. Depression predicts revascularization procedures for 5 years after coronary angiography. *Psychosom Med* 2003; 65: 229-36
245. Sullivan MD, Levy WC, Crane BA, Russo JE, Spertus JA. Usefulness of depression to predict time to combined end point of transplant or death for outpatients with advanced heart failure. *Am J Cardiol* 2004; 94: 1577-80.
246. Sutcliffe C, Burns A, Challis D, Mozley CG, Cordingley L, Bagley H, Huxley P. Depressed mood, cognitive impairment, and survival in older people admitted to care homes in England. *Am J Geriatr Psychiatry* 2007; 15: 708-15.
247. Suthahar A, Gurpreet K, Ambigga D, Dhachayani S, Fuad I, Maniam T, Osman CB, Ainsah O. Psychological distress, quality of life and coping in cancer patients: a prospective study. *Med J Malaysia* 2008; 63: 362-8.
248. Suzuki T, Shiga T, Kuwahara K, Kobayashi S, Suzuki S, Nishimura K, Suzuki A, Omori H, Mori F, Ishigooka J, Kasanuki H, Hagiwara N. Depression and outcomes in hospitalized Japanese patients with cardiovascular disease: Prospective single-center observational study. *Circul J* 2011; 75: 2465-73.

249. Takeida K, Nishi M, Miyake H. Mental depression and death in elderly persons. *J Epidemiol* 1997; 7: 210-3.
250. Takeshita J, Masaki K, Ahmed I, Foley DJ, Li YQ, Chen R, Fujii D, Ross GW, Petrovitch H, White L. Are depressive symptoms a risk factor for mortality in elderly Japanese American men?: The Honolulu-Asia Aging Study. *Am J Psychiatry* 2002; 159: 1127-32.
251. Teng PR, Yeh CJ, Lee MC, Lin HS, Lai TJ. Depressive symptoms as an independent risk factor for mortality in elderly persons: Results of a national longitudinal study. *Aging Ment Health* 2013; 17: 470-8.
252. Testa G, Cacciatore F, Galizia G, Della-Morte D, Mazzella F, Garguilo G, Langellotto A, Raucci C, Ferrara N, Rengo F, Abete P. Depressive symptoms predict mortality in elderly subjects with chronic heart failure. *Eur J Clin Invest* 2011; 41: 1310-7.
253. Teunissen SC, de Graeff A, de Haes HC, Voest EE. Prognostic significance of symptoms of hospitalised advanced cancer patients. *European Journal of Cancer* 2006; 42: 2510-6.
254. Thombs BD, Ziegelstein RC, Stewart DE, Abbey SE, Parakh K, Grace SL. Physical health status assessed during hospitalization for acute coronary syndrome predicts mortality 12 months later. *J Psychosom Res* 2008; 65: 587-93.
255. Tian J, Chen ZC, Hang LF. The effects of psychological status of the patients with digestive system cancers on prognosis of the disease. *Cancer Nursing* 2009; 32: 230-5.
256. Tilvis RS, Pitkala K, Nevantaus H. Prognosis of depression in old age. *Arch Gerontol Geriatr* 1998; Suppl. 6: 491-8.
257. Tully PJ, Baker RA, Knight JL. Anxiety and depression as risk factors for mortality after coronary artery bypass surgery. *J Psychosom Res* 2008; 64: 285-90.
258. Tzeis S, Kolb C, Baumert J, Reents T, Zrenner B, Deisenhofer I, Ronel J, Andrikopoulos G, Ladwig KH. Effect of depression on mortality in implantable cardioverter defibrillator recipients--findings from the prospective LICAD study. *PACE - Pacing and Clinical Electrophysiology* 2011; 34: 991-7.
259. Vaccarino V, Kasl SV, Abramson J, Krumholz HM. Depressive symptoms and risk of functional decline and death in patients with heart failure. *J Am Coll Cardiol* 2001; 38: 199-205.
260. van den Brink CL, Tijhuis M, van den Bos GAM, Giampaoli S, Nissinen A, Kromhout D. The contribution of self-rated health and depressive symptoms to disability severity as a predictor of 10-year mortality in European elderly men. *Am J Public Health* 2005; 95: 2029-34.
261. van den Broek KC, de Filippi CR, Christenson RH, Seliger SL, Gottdiener JS, Kop WJ. Predictive value of depressive symptoms and B-type natriuretic peptide for new-onset heart failure and mortality. *Am J Cardiol* 2011; 107: 723-9.
262. van Dijk S, van den Beukel TO, Dekker FW, le Cessie S, Kaptein AA, Honig A, Siegert CE, Boeschoten EW, Krediet RT, Verduijn M; NECOSAD Study Group. Short-term versus long-term effects of depressive symptoms on mortality in patients on dialysis. *Psychosom Med* 2012; 74: 854-60.
263. van Jaarsveld CH, Ranchor AV, Kempen GIJM, Coyne JC, van Veldhuisen DJ, Ormel J, Sanderman R. Gender-specific risk factors for mortality associated with incident coronary heart disease--a prospective community-based study. *Prev Med* 2006; 43: 361-7.



264. Vogt T, Pope C, Mullooly J, Hollis J. Mental health status as a predictor of morbidity and mortality: a 15-year follow-up of members of a health maintenance organization. *Am J Public Health* 1994; 84: 227-31.
265. Volz A, Schmid JP, Zwahlen M, Kohls S, Saner H, Barth J. Predictors of readmission and health related quality of life in patients with chronic heart failure: a comparison of different psychosocial aspects. *J Behav Med* 2011; 34: 13-22
266. von Ammon Cavanaugh S, Furlanetto LM, Creech SD, Powell LH. Medical illness, past depression, and present depression: A predictive triad for in-hospital mortality. *Am J Psychiatry* 2001; 158: 43-8.
267. Wassertheil-Smoller S, Shumaker S, Ockene J, Talavera GA, Geenland P, Cochrane B, Robbins J, Aragaki A, Dunbar-Jacob J. Depression and cardiovascular sequelae in postmenopausal women. The Women's Health Initiative (WHI). *Arch Intern Med* 2004; 164: 289-98.
268. Watkins LL, Koch GG, Sherwood A, Blumenthal JA, Davidson JR, O'Connor C, Sketch MH. Association of anxiety and depression with all-cause mortality in individuals with coronary heart disease. *J Am Heart Assoc* 2013; 2: e000068.
269. Watson M, Homewood J, Haviland J, Bliss JM. Influence of psychological response on breast cancer survival : 10-year follow-up of population-based cohort. *European Journal of Cancer* 2005; 41: 1710-4.
270. Welin C, Lappas G, Wilhelmsen L. Independent importance of psychosocial factors for prognosis after myocardial infarction. *J Intern Med* 2000; 247: 629 -39.
271. Whang W, Shimbo D, Kronish IM, Duvall WL, Julien H, Iyer P, Burg MM, Davidson KW. Depressive symptoms and all-cause mortality in unstable angina pectoris (from the Coronary Psychosocial Evaluation Studies [COPEs]). *Am J Cardiol* 2010; 106: 1104-7
272. Wheeler A, Beltrame J, Tucker G, Air T, Ling LH, Schrader G. Depression and 5-year mortality in patients with acute myocardial infarction: analysis of the IDACC database. *Austr Nw Zeal J Psychiatry* 2012; 46: 669-75.
273. Whooley MA, Browner WS. Association between depressive symptoms and mortality in older women. *Arch Intern Med* 1998; 158: 2129-35.
274. Whooley MA, de Jonge P, Vittinghoff E, Otte C, Moos R, Carney RM, Ali S, Dowray S, Na B, Eeldman MD, Schiller NB, Browner WS. Depressive symptoms, health behaviors, and risk of cardiovascular events in patients with coronary heart disease. *JAMA* 2008; 300: 2379-88.
275. Williams MM, Xiong C, Morris JC, Galvin JE. Survival and mortality differences between dementia with Lewy bodies vs Alzheimer disease. *Neurology* 2006; 67: 1935-41.
276. Wilson K, Mottram P, Hussain M. Survival in the community of the very old depressed, discharged from medical inpatient care. *Int J Geriatr Psychiatry* 2007; 22: 974-9.
277. Winkley K, Stahl D, Chalder T, Edmonds ME, Ismail K. Risk factors associated with adverse outcomes in a population-based prospective cohort study of people with their first diabetic foot ulcer. *J Diabetes Complications* 2007; 21: 341-9.
278. Winkley K, Sallis H, Kariyawasam D, Leelarathna LH, Chalder T, Edmonds ME, Stahl D, Ismail K. Five-year follow-up of a cohort of people with their first diabetic foot ulcer: The persistent effect of depression on mortality. *Diabetologia* 2012; 55: 303-10.

279. Wu JR, Moser DK, Rayens Mk, de Jong MJ, Chung ML, Riegel B, Lennie TA. Rurality and event-free survival in patients with heart failure. *Heart and Lung: Journal of Acute and Critical Care* 2010; 39: 512-20.
280. Wulsin LR, Evans JC, Vasani RS, Murabito JM, Kelly-Hayes M, Benjamin EJ. Depressive symptoms, coronary heart disease, and overall mortality in the Framingham Heart Study. *Psychosom Med* 2005; 67: 697-702.
281. Wyman L, Crum RM, Celentano D. Depressed mood and cause-specific mortality: a 40-year general community assessment. *Ann Epidemiol* 2012; 22: 638-43.
282. Yaffe K, Edwards ER, Covinsky KE, Lui LY, Eng MAC. Depressive symptoms and risk of mortality in frail, community-living elderly persons. *Am J Geriatr Psychiatry* 2003; 11: 561-7.
283. Yasuda N, Mino Y, Koda S, Ohara H. The differential influence of distinct clusters of psychiatric symptoms, as assessed by the general health questionnaire, on cause of death in older persons living in a rural community of Japan. *J Am Geriatr Soc* 2002; 50: 313-20.
284. Ye S, Muntner P, Shimbo D, Judd SE, Richman J, Davidson KW, Safford MM. Behavioral mechanisms, elevated depressive symptoms, and the risk for myocardial infarction or death in individuals with coronary heart disease: the REGARDS (Reason for Geographic and Racial Differences in Stroke) study. *J Am Coll Cardiol* 2013; 61: 622-30.
285. Yohannes AM, Baldwin RC, Connolly MJ. Predictors of 1-year mortality in patients discharged from hospital following acute exacerbation of chronic obstructive pulmonary disease. *Age Ageing* 2005; 34: 491-6.
286. Young BA, Von Korff M, Heckbert SR, Ludman EJ, Rutter C, Lin EHB, Ciechanowski PS, Oliver M, Williams L, Himmelfarb J, Katon WJ. Association of major depression and mortality in Stage 5 diabetic chronic kidney disease. *Gen Hosp Psychiatry* 2010; 32: 119-24.
287. Yu H, Wang Y, Ge X, Wu X, Mao X. Depression and survival in Chinese patients with gastric cancer: a prospective study. *Asian Pacific J Cancer Prev* 2012; 13: 391-4.
288. Zahn D, Weidner G, Beyersmann J, Smits JMA, Deng MC, Kaczmarek I, Meyer S, Reichenspurner H, Mehlhorn U, Wagner FM, Spaderna H. Composite risk scores and depression as predictors of competing waiting-list outcomes: the Waiting for a New Heart Study. *Transpl Int* 2010; 23: 1223-32.
289. Zelle DM, Dorland HF, Rosmalen JG, Corpeleijn E, Gans RO, Homan van der Heide JJ, van Son WJ, Navis G, Bakker SJ. Impact of depression on long-term outcome after renal transplantation: A prospective cohort study. *Transplantation* 2012; 94: 1033-40.
290. Zimmermann PR, Camey SA, de Jesus Mari J. A cohort study to assess the impact of depression on patients with kidney disease. *International Journal of Psychiatry in Medicine* 2006; 36: 457-68.
291. Zuidersma M, Conradi HJ, van Melle JP, Ormel J, de Jonge P. Self-reported depressive symptoms, diagnosed clinical depression and cardiac morbidity and mortality after myocardial infarction. *Int J Cardiol* 2013; 167: 2775-80.
292. Zuluaga MC, Guallar-Castillón P, Rodríguez-Pascual C, Conde-Herrera M, Conthe P, Rodríguez-Artalejo F. Mechanisms of the association between depressive symptoms and long-term mortality in heart failure. *Am Heart J* 2010; 159: 231-7.
